# Supplementary material
Source: MDPI journal article supplement (https://www.mdpi.com/2073-4344/12/2/127)
Supplement: s1 [file s1]

**Palladium-catalyzed domino cycloisomerization/double condensation of acetylenic acids with dinucleophiles**

Nerea Conde, María Teresa Herrero, Garazi Urgoitia and Raul SanMartin\*

*Department of Organic and Inorganic Chemistry, Faculty of Science and Technology,  
University of the Basque Country (UPV-EHU), 48940 Leioa (Spain).*

*Fax: (+34)-946012748; phone: (+34)-946015435; e-mail: [raul.sanmartin@ehu.eus](mailto:raul.sanmartin@ehu.eus)*

Table of contents

|                                                                                        |     |
|----------------------------------------------------------------------------------------|-----|
| Synthesis of 5-phenylpent-4-ynoic acid.....                                            | S2  |
| Table S1. Palladium-catalyzed formation of <b>4a</b> . Initial experiments. ....       | S2  |
| Structure factor tables .....                                                          | S3  |
| Table S2. Reaction of methylene lactone <b>7</b> with anthranilic acid <b>3a</b> ..... | S6  |
| Figure S1. Transient species and catalysts detected by ESI-mass spectrometry.....      | S6  |
| ESI-MS results.....                                                                    | S7  |
| <sup>1</sup> H- and <sup>13</sup> C-NMR spectra .....                                  | S15 |
| References.....                                                                        | S29 |

**Synthesis of 5-phenylpent-4-ynoic acid.** Chromium trioxide (2.5 g, 25 mmol) was dissolved in water (7.5 mL), and concentrated sulfuric acid (2.5 mL) was added dropwise with careful stirring and cooling in an ice-water bath. From this solution (Jones reagent), 4 mL were added dropwise to a solution of pent-4-yn-1-ol (204 mg, 1.27 mmol) in acetone (20 mL) at 0°C. Stirring was continued for 4 h at the same temperature, and then *i*-PrOH (5 mL) was added. The mixture was acidified with 1 M aqueous HCl to pH = 1 and extracted with CH<sub>2</sub>Cl<sub>2</sub> (3 × 20 mL). The combined organic layers were washed with water (20 mL), dried over anhydrous NaSO<sub>4</sub> and filtered, and the filtrate concentrated *in vacuo*. Purification by flash column chromatography (7:3 Hexanes:EtOAc) provided 5-phenylpent-4-ynoic acid (121.1 mg, 58%) as white prisms; m.p. 96-99 °C (CHCl<sub>3</sub>) (Lit.<sup>1</sup> 103-107 °C); <sup>1</sup>H-NMR (CDCl<sub>3</sub>) δ 11.49 (s, 1H, COOH), 7.49-7.34 (m, 2H, H<sub>arom</sub>), 7.34-7.16 (m, 3H, H<sub>arom</sub>), 2.89-2.51 (m, 4H, CH<sub>2</sub>); <sup>13</sup>C-NMR (CDCl<sub>3</sub>) δ 178.4 (COOH), 131.6, 128.2, 127.9 (C<sub>arom</sub>), 123.4 (qC<sub>arom</sub>), 87.6 (qC), 81.4 (qC), 33.5 (CH<sub>2</sub>), 15.1 (CH<sub>2</sub>).

**Table S1.** Palladium-catalyzed formation of benzo[*d*]pyrrolooxazine-1,5-dione **4a**. Initial experiments.<sup>a</sup>

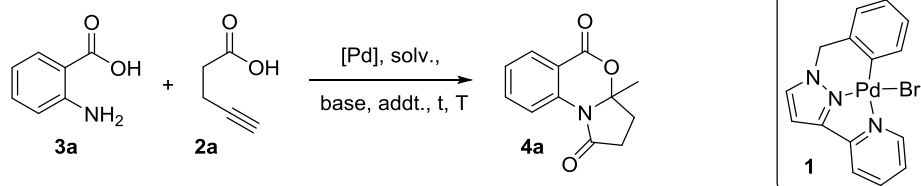

| Entry | solv. (0.1 M)                         | [Pd] (10 <sup>-2</sup> mol%)       | Base                            | Additive                                                        | T (°C) | t (h) | 4a (%) <sup>b</sup> |
|-------|---------------------------------------|------------------------------------|---------------------------------|-----------------------------------------------------------------|--------|-------|---------------------|
| 1     | PhMe                                  | Pd(OAc) <sub>2</sub>               | -                               | -                                                               | 100    | 96    | -                   |
| 2     | MeOH                                  | <b>1</b>                           | Et <sub>3</sub> N               | -                                                               | 80     | 120   | -                   |
| 3     | DMF                                   | PdCl <sub>2</sub>                  | Cs <sub>2</sub> CO <sub>3</sub> | -                                                               | 120    | 120   | -                   |
| 4     | THF                                   | Pd(PPh <sub>3</sub> ) <sub>4</sub> | DBU                             | BF <sub>3</sub> ·O(C <sub>2</sub> H <sub>5</sub> ) <sub>2</sub> | 80     | 120   | -                   |
| 5     | H <sub>2</sub> O                      | Pd(OAc) <sub>2</sub>               | pyridine                        | -                                                               | 110    | 120   | -                   |
| 6     | DMA                                   | <b>1</b>                           | KO <sup>t</sup> Bu              | -                                                               | 130    | 96    | -                   |
| 7     | DMSO                                  | Pd(OAc) <sub>2</sub>               | DMAP                            | BF <sub>3</sub> ·O(C <sub>2</sub> H <sub>5</sub> ) <sub>2</sub> | 120    | 96    | -                   |
| 8     | MeCN                                  | <b>1</b>                           | Cs <sub>2</sub> CO <sub>3</sub> | -                                                               | 90     | 120   | -                   |
| 9     | CH <sub>2</sub> Cl <sub>2</sub>       | Pd(OAc) <sub>2</sub>               | LiOH                            | -                                                               | 70     | 96    | -                   |
| 9     | CH <sub>2</sub> Cl <sub>2</sub>       | <b>1</b>                           | DIPEA                           | -                                                               | 60     | 96    | <5                  |
| 10    | THF                                   | Pd(PPh <sub>3</sub> ) <sub>4</sub> | Et <sub>3</sub> N               | BF <sub>3</sub> ·O(C <sub>2</sub> H <sub>5</sub> ) <sub>2</sub> | 80     | 120   | -                   |
| 11    | MeOH                                  | Pd(PPh <sub>3</sub> ) <sub>4</sub> | NaOH                            | -                                                               | 100    | 120   | -                   |
| 12    | DMF                                   | PdCl <sub>2</sub>                  | KOH <sub>3</sub>                | -                                                               | 120    | 96    | -                   |
| 13    | CHCl <sub>3</sub> (0.1)               | <b>1</b> (10 <sup>-2</sup> )       | Cs <sub>2</sub> CO <sub>3</sub> | -                                                               | 60     | 96    | -                   |
| 14    | CH <sub>2</sub> Cl <sub>2</sub>       | Pd(OAc) <sub>2</sub>               | Et <sub>3</sub> N               | -                                                               | 70     | 96    | <5                  |
| 15    | CHCl <sub>3</sub> (0.1)               | <b>1</b> (10 <sup>-2</sup> )       | Et <sub>3</sub> N               | -                                                               | 60     | 96    | 14                  |
| 16    | CH <sub>2</sub> Cl <sub>2</sub> (0.1) | <b>1</b> (10 <sup>-2</sup> )       | Et <sub>3</sub> N               | -                                                               | 60     | 96    | <5                  |

<sup>a</sup> Reaction conditions: **2a** (0.2 mmol), **3a** (0.2 mmol), base (2 mol%), additive (10<sup>-2</sup> mol%). <sup>b</sup> Isolated yields.

## Benzopyrrolooxazine dione 4a. Structure factor table

|                               |                |                                  |                    |
|-------------------------------|----------------|----------------------------------|--------------------|
| Bond precision:               | C-C = 0.0016 Å |                                  | Wavelength=1.54184 |
| Cell:                         | a=12.0162 (2)  | b=11.7139 (2)                    | c=14.3786 (3)      |
|                               | alpha=90       | beta=90                          | gamma=90           |
| Temperature:                  | 100 K          |                                  |                    |
|                               | Calculated     | Reported                         |                    |
| Volume                        | 2023.88 (6)    | 2023.88 (6)                      |                    |
| Space group                   | P b c a        | P b c a                          |                    |
| Hall group                    | -P 2ac 2ab     | -P 2ac 2ab                       |                    |
| Moiety formula                | C12 H11 N O3   | C12 H11 N1 O3                    |                    |
| Sum formula                   | C12 H11 N O3   | C12 H11 N O3                     |                    |
| Mr                            | 217.22         | 217.22                           |                    |
| Dx, g cm-3                    | 1.426          | 1.426                            |                    |
| Z                             | 8              | 8                                |                    |
| Mu (mm-1)                     | 0.858          | 0.858                            |                    |
| F000                          | 912.0          | 912.0                            |                    |
| F000'                         | 915.03         |                                  |                    |
| h,k,lmax                      | 14,14,17       | 14,14,17                         |                    |
| Nref                          | 2003           | 2001                             |                    |
| Tmin,Tmax                     | 0.847,0.918    | 0.891,0.943                      |                    |
| Tmin'                         | 0.847          |                                  |                    |
| Correction method= ANALYTICAL |                |                                  |                    |
| Data completeness=            | 0.999          | Theta(max)= 72.440               |                    |
| R(reflections)=               | 0.0322 ( 1800) | wR2(reflections)= 0.0833 ( 2001) |                    |
| S =                           | 1.058          | Npar= 146                        |                    |

## Benzopyridothiadiazinone dioxide 4g. Structure factor table

|                                |                 |                                 |             |
|--------------------------------|-----------------|---------------------------------|-------------|
| Bond precision: C-C = 0.0020 Å |                 | Wavelength=1.54184              |             |
| Cell:                          | a=11.5076(2)    | b=14.6631(2)                    | c=7.0969(1) |
|                                | alpha=90        | beta=96.595(1)                  | gamma=90    |
| Temperature:                   | 100 K           |                                 |             |
|                                | Calculated      | Reported                        |             |
| Volume                         | 1189.59(3)      | 1189.59(3)                      |             |
| Space group                    | C c             | C 1 c 1                         |             |
| Hall group                     | C -2yc          | C -2yc                          |             |
| Moiety formula                 | C12 H14 N2 O3 S | C12 H14 N2 O3 S1                |             |
| Sum formula                    | C12 H14 N2 O3 S | C12 H14 N2 O3 S                 |             |
| Mr                             | 266.31          | 266.31                          |             |
| Dx, g cm-3                     | 1.487           | 1.487                           |             |
| Z                              | 4               | 4                               |             |
| Mu (mm-1)                      | 2.460           | 2.460                           |             |
| F000                           | 560.0           | 560.0                           |             |
| F000'                          | 562.96          |                                 |             |
| h,k,lmax                       | 14,18,8         | 14,18,8                         |             |
| Nref                           | 2341[ 1175]     | 2286                            |             |
| Tmin,Tmax                      | 0.625,0.754     | 0.602,0.829                     |             |
| Tmin'                          | 0.438           |                                 |             |
| Correction method= ANALYTICAL  |                 |                                 |             |
| Data completeness= 1.95/0.98   |                 | Theta(max)= 71.980              |             |
| R(reflections)= 0.0208( 2277)  |                 | wR2(reflections)= 0.0545( 2286) |             |
| S = 1.078                      |                 | Npar= 212                       |             |

## Benzopyridooxazine dione 4e. Structure factor table

|                               |                |                                  |               |
|-------------------------------|----------------|----------------------------------|---------------|
| Bond precision:               | C-C = 0.0017 Å | Wavelength=1.54184               |               |
| Cell:                         | a=6.5496 (1)   | b=18.3428 (3)                    | c=23.7505 (3) |
|                               | alpha=90       | beta=90                          | gamma=90      |
| Temperature:                  | 100 K          |                                  |               |
|                               | Calculated     | Reported                         |               |
| Volume                        | 2853.34 (7)    | 2853.34 (7)                      |               |
| Space group                   | P b c a        | P b c a                          |               |
| Hall group                    | -P 2ac 2ab     | -P 2ac 2ab                       |               |
| Moiety formula                | C18 H15 N O3   | C18 H15 N1 O3                    |               |
| Sum formula                   | C18 H15 N O3   | C18 H15 N O3                     |               |
| Mr                            | 293.31         | 293.31                           |               |
| Dx,g cm-3                     | 1.366          | 1.366                            |               |
| Z                             | 8              | 8                                |               |
| Mu (mm-1)                     | 0.761          | 0.761                            |               |
| F000                          | 1232.0         | 1232.0                           |               |
| F000'                         | 1235.86        |                                  |               |
| h,k,lmax                      | 8,22,29        | 8,22,29                          |               |
| Nref                          | 2938           | 2934                             |               |
| Tmin,Tmax                     | 0.827,0.874    | 0.861,0.900                      |               |
| Tmin'                         | 0.827          |                                  |               |
| Correction method= ANALYTICAL |                |                                  |               |
| Data completeness=            | 0.999          | Theta(max)= 74.930               |               |
| R(reflections)=               | 0.0362 ( 2796) | wR2(reflections)= 0.0926 ( 2934) |               |
| S =                           | 1.058          | Npar= 199                        |               |

**Table S2.** Reaction of methylene lactone **7** with anthranilic acid **3a**

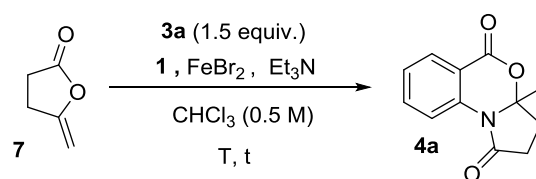

| Entry          | <b>1</b> (mol%)        | $\text{Et}_3\text{N}$ (mol%) | $\text{FeBr}_3$ (mol%) | $T$ ( $^\circ\text{C}$ ) | $t$ (h) | <b>4a</b> (%) <sup>a</sup> |
|----------------|------------------------|------------------------------|------------------------|--------------------------|---------|----------------------------|
| 1              | <b>1</b> ( $10^{-2}$ ) | 2                            | -                      | 50                       | 24      | -                          |
| 2              | <b>1</b> ( $10^{-2}$ ) | 2                            | -                      | 120                      | 96      | 14                         |
| 3              | <b>1</b> ( $10^{-2}$ ) | -                            | -                      | 120                      | 96      | 7                          |
| 4              | -                      | 2                            | $10^{-2}$              | 80                       | 96      | -                          |
| 5              | -                      | 2                            | $10^{-2}$              | 120                      | 96      | <5                         |
| 6              | -                      | -                            | $10^{-2}$              | 120                      | 96      | -                          |
| 7 <sup>c</sup> | <b>1</b> ( $10^{-4}$ ) | $10^{-2}$                    | $10^{-4}$              | 120                      | 96      | 8                          |
| 8 <sup>d</sup> | <b>1</b> ( $10^{-4}$ ) | 2                            | $10^{-4}$              | 120                      | 96      | 10                         |
| 9 <sup>e</sup> | <b>1</b> ( $10^{-2}$ ) | 2                            | $10^{-2}$              | 120                      | 96      | 90                         |

<sup>a</sup> Isolated yields.

**Figure S1.** Transient species and catalysts detected by ESI-mass spectrometry

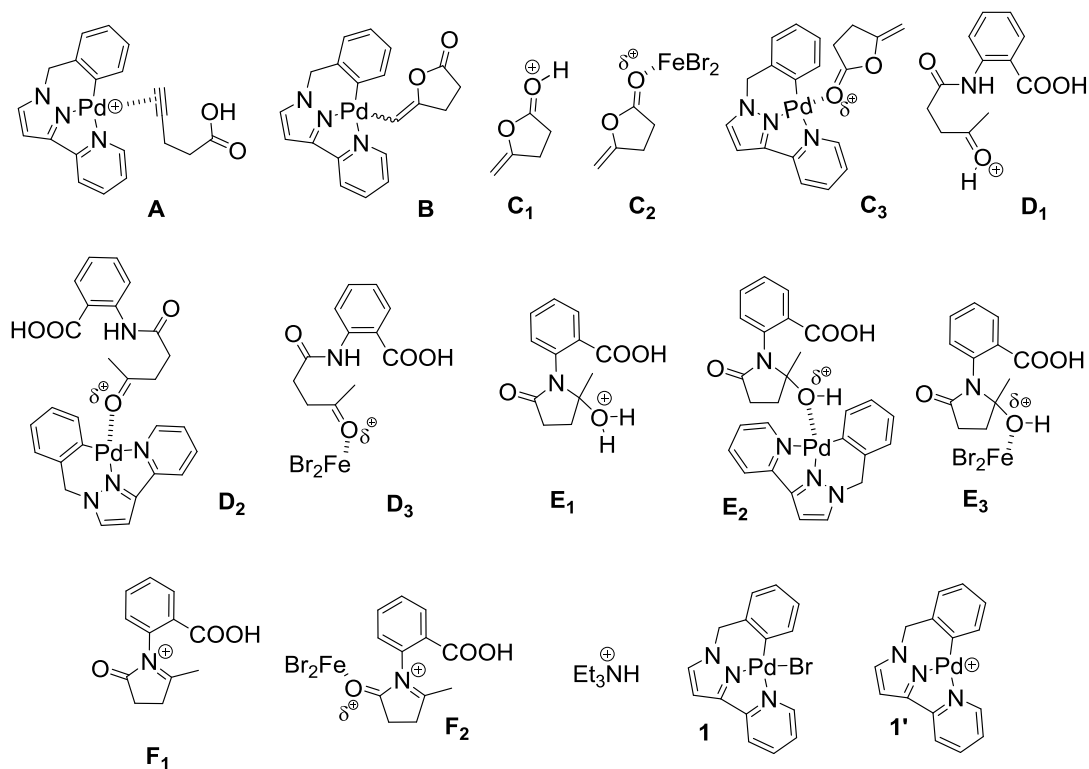

## ESI-MS analysis

Pd(II) complex **A** ( $M^+$ )

### Elemental Composition Report

Page 1

#### Single Mass Analysis

Tolerance = 5.0 mDa / DBE: min = -1.5, max = 50.0

Element prediction: Off

Number of isotope peaks used for i-FIT = 3

Monoisotopic Mass, Even Electron Ions

1719 formula(e) evaluated with 1 results within limits (up to 50 best isotopic matches for each mass)

Elements Used:

C: 0-20 H: 0-18 N: 0-3 O: 0-2 Br: 0-2 102Pd: 0-1 104Pd: 0-1 105Pd: 0-1 106Pd: 0-1 108Pd: 0-1  
110Pd: 0-1

NCG008

PAT160212-33588-01 (0.037) Is (1.00,1.00) C<sub>20</sub>H<sub>18</sub>N<sub>3</sub>O<sub>2</sub>Pd

1: TOF MS ES+  
2.59e+012

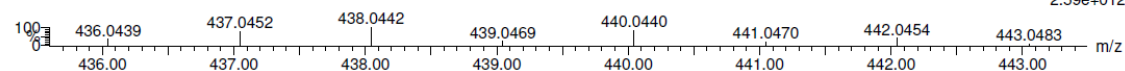

Minimum: -1.5  
Maximum: 50.0

| Mass     | Calc. Mass | mDa | PPM | DBE  | i-FIT | Norm | Conf (%) | Formula                                                             |
|----------|------------|-----|-----|------|-------|------|----------|---------------------------------------------------------------------|
| 437.0452 | 437.0450   | 0.2 | 0.5 | 13.5 | 87.4  | n/a  | n/a      | C <sub>20</sub> H <sub>18</sub> N <sub>3</sub> O <sub>2</sub> 105Pd |

Pd(II) complex **B** ( $MH^+$ )

### Elemental Composition Report

Page 1

#### Single Mass Analysis

Tolerance = 5.0 mDa / DBE: min = -1.5, max = 50.0

Element prediction: Off

Number of isotope peaks used for i-FIT = 3

Monoisotopic Mass, Even Electron Ions

1719 formula(e) evaluated with 1 results within limits (up to 50 best isotopic matches for each mass)

Elements Used:

C: 0-20 H: 0-18 N: 0-3 O: 0-2 Br: 0-2 102Pd: 0-1 104Pd: 0-1 105Pd: 0-1 106Pd: 0-1 108Pd: 0-1  
110Pd: 0-1

NCG008

PAT160212-33588-01 (0.037) Is (1.00,1.00) C<sub>20</sub>H<sub>18</sub>N<sub>3</sub>O<sub>2</sub>Pd

1: TOF MS ES+  
2.59e+012

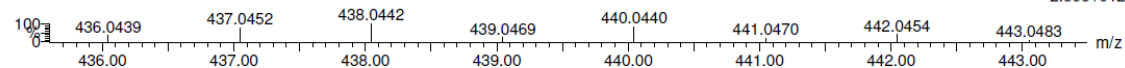

Minimum: -1.5  
Maximum: 50.0

| Mass     | Calc. Mass | mDa | PPM | DBE  | i-FIT | Norm | Conf (%) | Formula                                                             |
|----------|------------|-----|-----|------|-------|------|----------|---------------------------------------------------------------------|
| 437.0452 | 437.0450   | 0.2 | 0.5 | 13.5 | 87.4  | n/a  | n/a      | C <sub>20</sub> H <sub>18</sub> N <sub>3</sub> O <sub>2</sub> 105Pd |

Intermediate C<sub>1</sub> (M<sup>+</sup>)

## Elemental Composition Report

Page 1

## Single Mass Analysis

Tolerance = 1.0 mDa / DBE: min = -1.5, max = 50.0

Element prediction: Off

Number of isotope peaks used for i-FIT = 3

Monoisotopic Mass, Even Electron Ions

54 formula(e) evaluated with 1 results within limits (up to 50 best isotopic matches for each mass)

Elements Used:

C: 0-50 H: 0-50 N: 0-10 O: 0-10 Br: 0-10

NCG008

PAT160212-33588-01 (0.037) Is (1.00,1.00) C<sub>5</sub>H<sub>7</sub>O<sub>2</sub>1: TOF MS ES+  
9.41e+012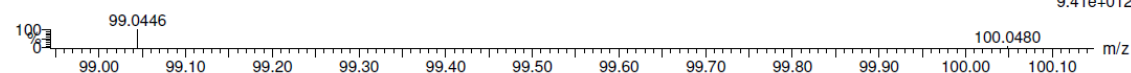

Minimum: -1.5  
Maximum: 1.0 10.0 50.0

| Mass    | Calc. Mass | mDa | PPM | DBE | i-FIT | Norm | Conf (%) | Formula                                      |
|---------|------------|-----|-----|-----|-------|------|----------|----------------------------------------------|
| 99.0446 | 99.0446    | 0.0 | 0.0 | 2.5 | 82.0  | n/a  | n/a      | C <sub>5</sub> H <sub>7</sub> O <sub>2</sub> |

Fe complex C<sub>2</sub> (MH<sup>+</sup>)

## Elemental Composition Report

Page 1

## Single Mass Analysis

Tolerance = 0.3 mDa / DBE: min = -1.5, max = 50.0

Element prediction: Off

Number of isotope peaks used for i-FIT = 3

Monoisotopic Mass, Even Electron Ions

413 formula(e) evaluated with 1 results within limits (up to 50 best isotopic matches for each mass)

Elements Used:

C: 0-5 H: 0-7 N: 0-3 O: 0-2 <sup>54</sup>Fe: 0-1 <sup>56</sup>Fe: 0-1 <sup>57</sup>Fe: 0-1 <sup>58</sup>Fe: 0-1 Br: 0-2

NCG008

PAT160212-33588-01 (0.037) Is (1.00,1.00) C<sub>5</sub>H<sub>7</sub>Br<sub>2</sub>FeO<sub>2</sub>1: TOF MS ES+  
4.47e+012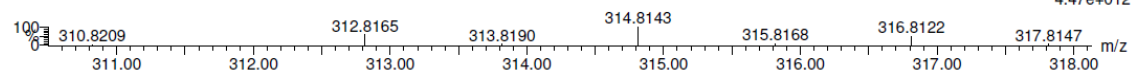

Minimum: -1.5  
Maximum: 0.3 10.0 50.0

| Mass     | Calc. Mass | mDa  | PPM  | DBE | i-FIT | Norm | Conf (%) | Formula                                                                       |
|----------|------------|------|------|-----|-------|------|----------|-------------------------------------------------------------------------------|
| 314.8143 | 314.8146   | -0.3 | -1.0 | 1.5 | 82.6  | n/a  | n/a      | C <sub>5</sub> H <sub>7</sub> O <sub>2</sub> <sup>58</sup> Fe Br <sub>2</sub> |

Pd(II) complex **C<sub>3</sub>** (M<sup>+</sup>)

## Elemental Composition Report

Page 1

## Single Mass Analysis

Tolerance = 0.3 mDa / DBE: min = -1.5, max = 50.0

Element prediction: Off

Number of isotope peaks used for i-FIT = 3

Monoisotopic Mass, Even Electron Ions

1841 formula(e) evaluated with 1 results within limits (up to 50 best isotopic matches for each mass)

Elements Used:

C: 0-20 H: 0-20 N: 0-3 O: 0-2 Br: 0-2 102Pd: 0-1 104Pd: 0-1 105Pd: 0-1 106Pd: 0-1 108Pd: 0-1

110Pd: 0-1

NCG008

PAT160212-33588-01 (0.037) Is (1.00,1.00) C<sub>20</sub>H<sub>18</sub>N<sub>3</sub>O<sub>2</sub>Pd1: TOF MS ES+  
2.59e+012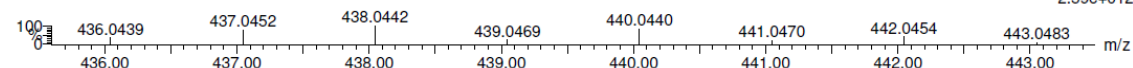

Minimum: -1.5  
Maximum: 0.3 10.0 50.0

| Mass     | Calc. Mass | mDa | PPM | DBE  | i-FIT | Norm | Conf (%) | Formula                                                             |
|----------|------------|-----|-----|------|-------|------|----------|---------------------------------------------------------------------|
| 437.0452 | 437.0450   | 0.2 | 0.5 | 13.5 | 88.2  | n/a  | n/a      | C <sub>20</sub> H <sub>18</sub> N <sub>3</sub> O <sub>2</sub> 105Pd |

Intermediate **D<sub>1</sub>** (M<sup>+</sup>)

## Elemental Composition Report

Page 1

## Single Mass Analysis

Tolerance = 0.3 mDa / DBE: min = -1.5, max = 50.0

Element prediction: Off

Number of isotope peaks used for i-FIT = 3

Monoisotopic Mass, Even Electron Ions

447 formula(e) evaluated with 1 results within limits (up to 50 best isotopic matches for each mass)

Elements Used:

C: 0-20 H: 0-20 N: 0-3 O: 0-4 Br: 0-2 102Pd: 0-1 104Pd: 0-1 105Pd: 0-1 106Pd: 0-1 108Pd: 0-1

110Pd: 0-1

NCG008

PAT160212-33588-01 (0.037) Is (1.00,1.00) C<sub>12</sub>H<sub>14</sub>N<sub>4</sub>O1: TOF MS ES+  
8.62e+012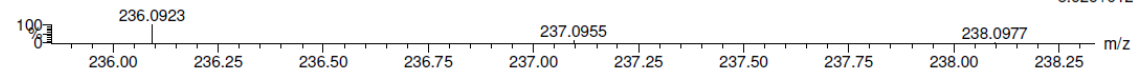

Minimum: -1.5  
Maximum: 0.3 10.0 50.0

| Mass     | Calc. Mass | mDa | PPM | DBE | i-FIT | Norm | Conf (%) | Formula                                          |
|----------|------------|-----|-----|-----|-------|------|----------|--------------------------------------------------|
| 236.0923 | 236.0923   | 0.0 | 0.0 | 6.5 | 38.5  | n/a  | n/a      | C <sub>12</sub> H <sub>14</sub> N <sub>4</sub> O |

Pd(II) complex **D<sub>2</sub>** (M<sup>+</sup>)

## Elemental Composition Report

Page 1

## Single Mass Analysis

Tolerance = 5.0 mDa / DBE: min = -1.5, max = 50.0

Element prediction: Off

Number of isotope peaks used for i-FIT = 3

Monoisotopic Mass, Even Electron Ions

7598 formula(e) evaluated with 1 results within limits (up to 50 best isotopic matches for each mass)

Elements Used:

C: 0-27 H: 0-27 N: 0-4 O: 0-4 Br: 0-2 102Pd: 0-1 104Pd: 0-1 105Pd: 0-1 106Pd: 0-1 108Pd: 0-1

110Pd: 0-1

NCG008

PAT160212-33588-01 (0.037) Is (1.00,1.00) C<sub>27</sub>H<sub>25</sub>N<sub>4</sub>O<sub>4</sub>Pd1: TOF MS ES+  
2.53e+012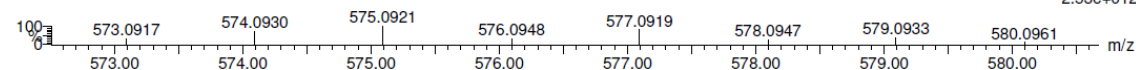

Minimum: -1.5  
Maximum: 50.0

| Mass     | Calc. Mass | mDa | PPM | DBE  | i-FIT | Norm | Conf (%) | Formula             |
|----------|------------|-----|-----|------|-------|------|----------|---------------------|
| 574.0930 | 574.0927   | 0.3 | 0.5 | 17.5 | 86.9  | n/a  | n/a      | C27 H25 N4 O4 105Pd |

Fe complex **D<sub>3</sub>** (MH<sup>+</sup>)

## Elemental Composition Report

Page 1

## Single Mass Analysis

Tolerance = 0.5 mDa / DBE: min = -1.5, max = 50.0

Element prediction: Off

Number of isotope peaks used for i-FIT = 3

Monoisotopic Mass, Even Electron Ions

716 formula(e) evaluated with 1 results within limits (up to 50 best isotopic matches for each mass)

Elements Used:

C: 0-12 H: 0-14 N: 0-2 O: 0-4 54Fe: 0-1 56Fe: 0-1 57Fe: 0-1 58Fe: 0-1 Br: 0-2

NCG008

PAT160212-33588-01 (0.037) Is (1.00,1.00) C<sub>12</sub>H<sub>14</sub>Br<sub>2</sub>FeNO<sub>4</sub>1: TOF MS ES+  
4.13e+012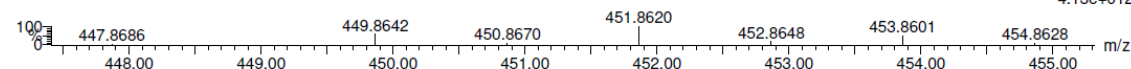

Minimum: -1.5  
Maximum: 50.0

| Mass     | Calc. Mass | mDa  | PPM  | DBE | i-FIT | Norm | Conf (%) | Formula               |
|----------|------------|------|------|-----|-------|------|----------|-----------------------|
| 451.8620 | 451.8622   | -0.2 | -0.4 | 5.5 | 81.0  | n/a  | n/a      | C12 H14 N O4 58Fe Br2 |

Intermediate **E<sub>1</sub>** (M<sup>+</sup>)

## Elemental Composition Report

Page 1

## Single Mass Analysis

Tolerance = 5.0 mDa / DBE: min = -1.5, max = 50.0

Element prediction: Off

Number of isotope peaks used for i-FIT = 3

Monoisotopic Mass, Even Electron Ions

48 formula(e) evaluated with 1 results within limits (up to 50 best isotopic matches for each mass)

Elements Used:

C: 0-12 H: 0-14 N: 0-2 O: 0-4 Br: 0-2

NCG008

PAT160212-33588-01 (0.037) Is (1.00,1.00) C<sub>12</sub>H<sub>14</sub>NO<sub>4</sub>1: TOF MS ES+  
8.62e+012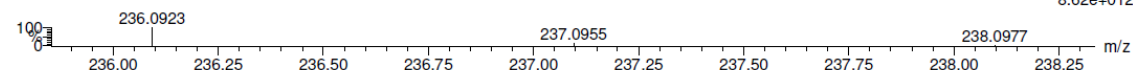

Minimum: -1.5  
Maximum: 5.0 10.0 50.0

| Mass     | Calc. Mass | mDa | PPM | DBE | i-FIT | Norm | Conf(%) | Formula      |
|----------|------------|-----|-----|-----|-------|------|---------|--------------|
| 236.0923 | 236.0923   | 0.0 | 0.0 | 6.5 | 38.3  | n/a  | n/a     | C12 H14 N O4 |

Pd(II) complex **E<sub>2</sub>** (M<sup>+</sup>)

## Elemental Composition Report

Page 1

## Single Mass Analysis

Tolerance = 5.0 mDa / DBE: min = -1.5, max = 50.0

Element prediction: Off

Number of isotope peaks used for i-FIT = 3

Monoisotopic Mass, Even Electron Ions

7598 formula(e) evaluated with 1 results within limits (up to 50 best isotopic matches for each mass)

Elements Used:

C: 0-27 H: 0-27 N: 0-4 O: 0-4 Br: 0-2 102Pd: 0-1 104Pd: 0-1 105Pd: 0-1 106Pd: 0-1 108Pd: 0-1

110Pd: 0-1

NCG008

PAT160212-33588-01 (0.037) Is (1.00,1.00) C<sub>27</sub>H<sub>25</sub>N<sub>4</sub>O<sub>4</sub>Pd1: TOF MS ES+  
2.53e+012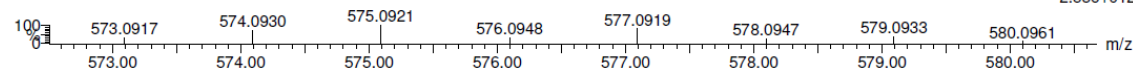

Minimum: -1.5  
Maximum: 5.0 10.0 50.0

| Mass     | Calc. Mass | mDa | PPM | DBE  | i-FIT | Norm | Conf(%) | Formula             |
|----------|------------|-----|-----|------|-------|------|---------|---------------------|
| 574.0930 | 574.0927   | 0.3 | 0.5 | 17.5 | 86.9  | n/a  | n/a     | C27 H25 N4 O4 105Pd |

Fe complex E<sub>3</sub> (MH<sup>+</sup>)

## Elemental Composition Report

Page 1

## Single Mass Analysis

Tolerance = 0.5 mDa / DBE: min = -1.5, max = 50.0

Element prediction: Off

Number of isotope peaks used for i-FIT = 3

Monoisotopic Mass, Even Electron Ions

716 formula(e) evaluated with 1 results within limits (up to 50 best isotopic matches for each mass)

Elements Used:

C: 0-12 H: 0-14 N: 0-2 O: 0-4 54Fe: 0-1 56Fe: 0-1 57Fe: 0-1 58Fe: 0-1 Br: 0-2

NCG008

PAT160212-33588-01 (0.037) Is (1.00,1.00) C<sub>12</sub>H<sub>14</sub>Br<sub>2</sub>FeNO<sub>4</sub>1: TOF MS ES+  
4.13e+012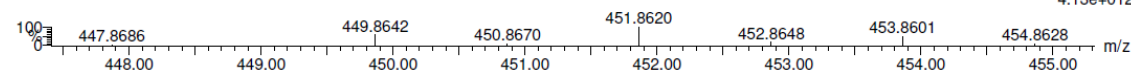

Minimum: -1.5  
Maximum: 0.5 10.0 50.0

| Mass     | Calc. Mass | mDa  | PPM  | DBE | i-FIT | Norm | Conf(%) | Formula                                                               |
|----------|------------|------|------|-----|-------|------|---------|-----------------------------------------------------------------------|
| 451.8620 | 451.8622   | -0.2 | -0.4 | 5.5 | 81.0  | n/a  | n/a     | C <sub>12</sub> H <sub>14</sub> N O <sub>4</sub> 58Fe Br <sub>2</sub> |

Intermediate F<sub>1</sub> (M<sup>+</sup>)

## Elemental Composition Report

Page 1

## Single Mass Analysis

Tolerance = 5.0 mDa / DBE: min = -1.5, max = 50.0

Element prediction: Off

Number of isotope peaks used for i-FIT = 3

Monoisotopic Mass, Even Electron Ions

430 formula(e) evaluated with 1 results within limits (up to 50 best isotopic matches for each mass)

Elements Used:

C: 0-27 H: 0-27 N: 0-4 O: 0-4 Br: 0-2 102Pd: 0-1 104Pd: 0-1 105Pd: 0-1 106Pd: 0-1 108Pd: 0-1 110Pd: 0-1

NCG008

PAT160212-33588-01 (0.037) Is (1.00,1.00) C<sub>12</sub>H<sub>12</sub>NO<sub>3</sub>1: TOF MS ES+  
8.65e+012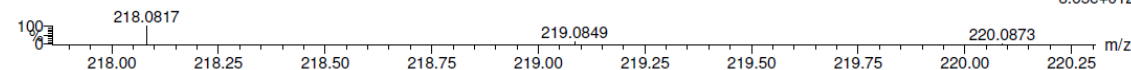

Minimum: -1.5  
Maximum: 5.0 10.0 50.0

| Mass     | Calc. Mass | mDa | PPM | DBE | i-FIT | Norm | Conf(%) | Formula                                          |
|----------|------------|-----|-----|-----|-------|------|---------|--------------------------------------------------|
| 218.0817 | 218.0817   | 0.0 | 0.0 | 7.5 | 42.3  | n/a  | n/a     | C <sub>12</sub> H <sub>12</sub> N O <sub>3</sub> |

Fe complex **F<sub>2</sub>** (M<sup>+</sup>)

### Elemental Composition Report

Page 1

#### Single Mass Analysis

Tolerance = 0.5 mDa / DBE: min = -1.5, max = 50.0

Element prediction: Off

Number of isotope peaks used for i-FIT = 3

Monoisotopic Mass, Even Electron Ions

453 formula(e) evaluated with 1 results within limits (up to 50 best isotopic matches for each mass)

Elements Used:

C: 0-12 H: 0-12 N: 0-1 O: 0-4 <sup>54</sup>Fe: 0-1 <sup>56</sup>Fe: 0-1 <sup>57</sup>Fe: 0-1 <sup>58</sup>Fe: 0-1 Br: 0-2

NCG008

PAT160212-33588-01 (0.037) Is (1.00,1.00) C<sub>12</sub>H<sub>12</sub>Br<sub>2</sub>FeNO<sub>3</sub>

1: TOF MS ES+  
4.13e+012

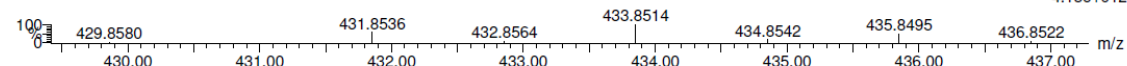

Minimum: -1.5  
Maximum: 0.5 10.0 50.0

| Mass     | Calc. Mass | mDa  | PPM  | DBE | i-FIT | Norm | Conf(%) | Formula                                                                           |
|----------|------------|------|------|-----|-------|------|---------|-----------------------------------------------------------------------------------|
| 433.8514 | 433.8517   | -0.3 | -0.7 | 6.5 | 81.0  | n/a  | n/a     | C <sub>12</sub> H <sub>12</sub> N O <sub>3</sub> <sup>58</sup> Fe Br <sub>2</sub> |

Et<sub>3</sub>NH (MH<sup>+</sup>)

### Elemental Composition Report

Page 1

#### Single Mass Analysis

Tolerance = 5.0 mDa / DBE: min = -1.5, max = 50.0

Element prediction: Off

Number of isotope peaks used for i-FIT = 3

Monoisotopic Mass, Even Electron Ions

24 formula(e) evaluated with 1 results within limits (up to 50 best isotopic matches for each mass)

Elements Used:

C: 0-20 H: 0-18 N: 0-3 O: 0-2 Br: 0-2 <sup>102</sup>Pd: 0-1 <sup>104</sup>Pd: 0-1 <sup>105</sup>Pd: 0-1 <sup>106</sup>Pd: 0-1 <sup>108</sup>Pd: 0-1 <sup>110</sup>Pd: 0-1

NCG008

PAT160212-33588-01 (0.037) Is (1.00,1.00) C<sub>6</sub>H<sub>16</sub>N

1: TOF MS ES+  
9.30e+012

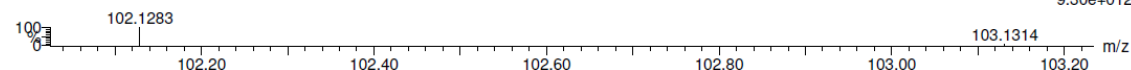

Minimum: -1.5  
Maximum: 5.0 10.0 50.0

| Mass     | Calc. Mass | mDa | PPM | DBE  | i-FIT | Norm | Conf(%) | Formula                          |
|----------|------------|-----|-----|------|-------|------|---------|----------------------------------|
| 102.1283 | 102.1283   | 0.0 | 0.0 | -0.5 | 81.3  | n/a  | n/a     | C <sub>6</sub> H <sub>16</sub> N |

# Pd(II) complex **1** (MH<sup>+</sup>)

## Elemental Composition Report

Page 1

### Single Mass Analysis

Tolerance = 1.0 mDa / DBE: min = -1.5, max = 50.0

Element prediction: Off

Number of isotope peaks used for i-FIT = 3

Monoisotopic Mass, Even Electron Ions

623 formula(e) evaluated with 1 results within limits (up to 50 best isotopic matches for each mass)

Elements Used:

C: 0-15 H: 0-13 N: 0-3 O: 0-1 Br: 0-1 102Pd: 0-1 104Pd: 0-1 105Pd: 0-1 106Pd: 0-1 108Pd: 0-1

110Pd: 0-1

NCG008

PAT160212-33588-01 (0.037) Is (1.00,1.00) C15H13BrN3Pd

1: TOF MS ES+  
2.44e+012

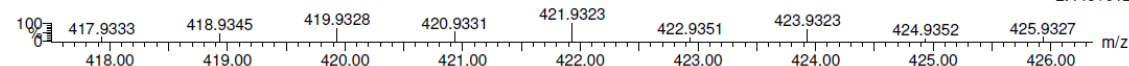

Minimum: -1.5  
Maximum: 1.0 10.0 50.0

| Mass     | Calc. Mass | mDa | PPM | DBE  | i-FIT | Norm | Conf(%) | Formula             |
|----------|------------|-----|-----|------|-------|------|---------|---------------------|
| 419.9328 | 419.9328   | 0.0 | 0.0 | 10.5 | 84.8  | n/a  | n/a     | C15 H13 N3 Br 106Pd |

# Pd(II) complex **1'** (M<sup>+</sup>)

## Elemental Composition Report

Page 1

### Single Mass Analysis

Tolerance = 5.0 mDa / DBE: min = -1.5, max = 50.0

Element prediction: Off

Number of isotope peaks used for i-FIT = 3

Monoisotopic Mass, Even Electron Ions

279 formula(e) evaluated with 1 results within limits (up to 50 best isotopic matches for each mass)

Elements Used:

C: 0-15 H: 0-13 N: 0-4 Br: 0-1 102Pd: 0-1 104Pd: 0-1 105Pd: 0-1 106Pd: 0-1 108Pd: 0-1 110Pd: 0-1

NCG008

PAT160212-33588-01 (0.037) Is (1.00,1.00) C15H12N3Pd

1: TOF MS ES+  
2.63e+012

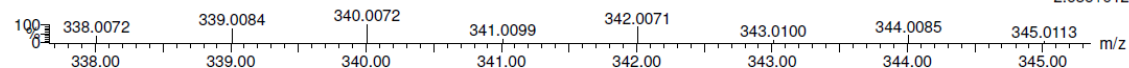

Minimum: -1.5  
Maximum: 5.0 10.0 50.0

| Mass     | Calc. Mass | mDa | PPM | DBE  | i-FIT | Norm | Conf(%) | Formula          |
|----------|------------|-----|-----|------|-------|------|---------|------------------|
| 339.0084 | 339.0082   | 0.2 | 0.6 | 11.5 | 87.9  | n/a  | n/a     | C15 H12 N3 105Pd |

# NMR Spectra

3a-methyl-3,3a-dihydro-5H-benzo[d]pyrrolo[2,1-b][1,3]oxazine-1,5(2H)-dione (**4a**)

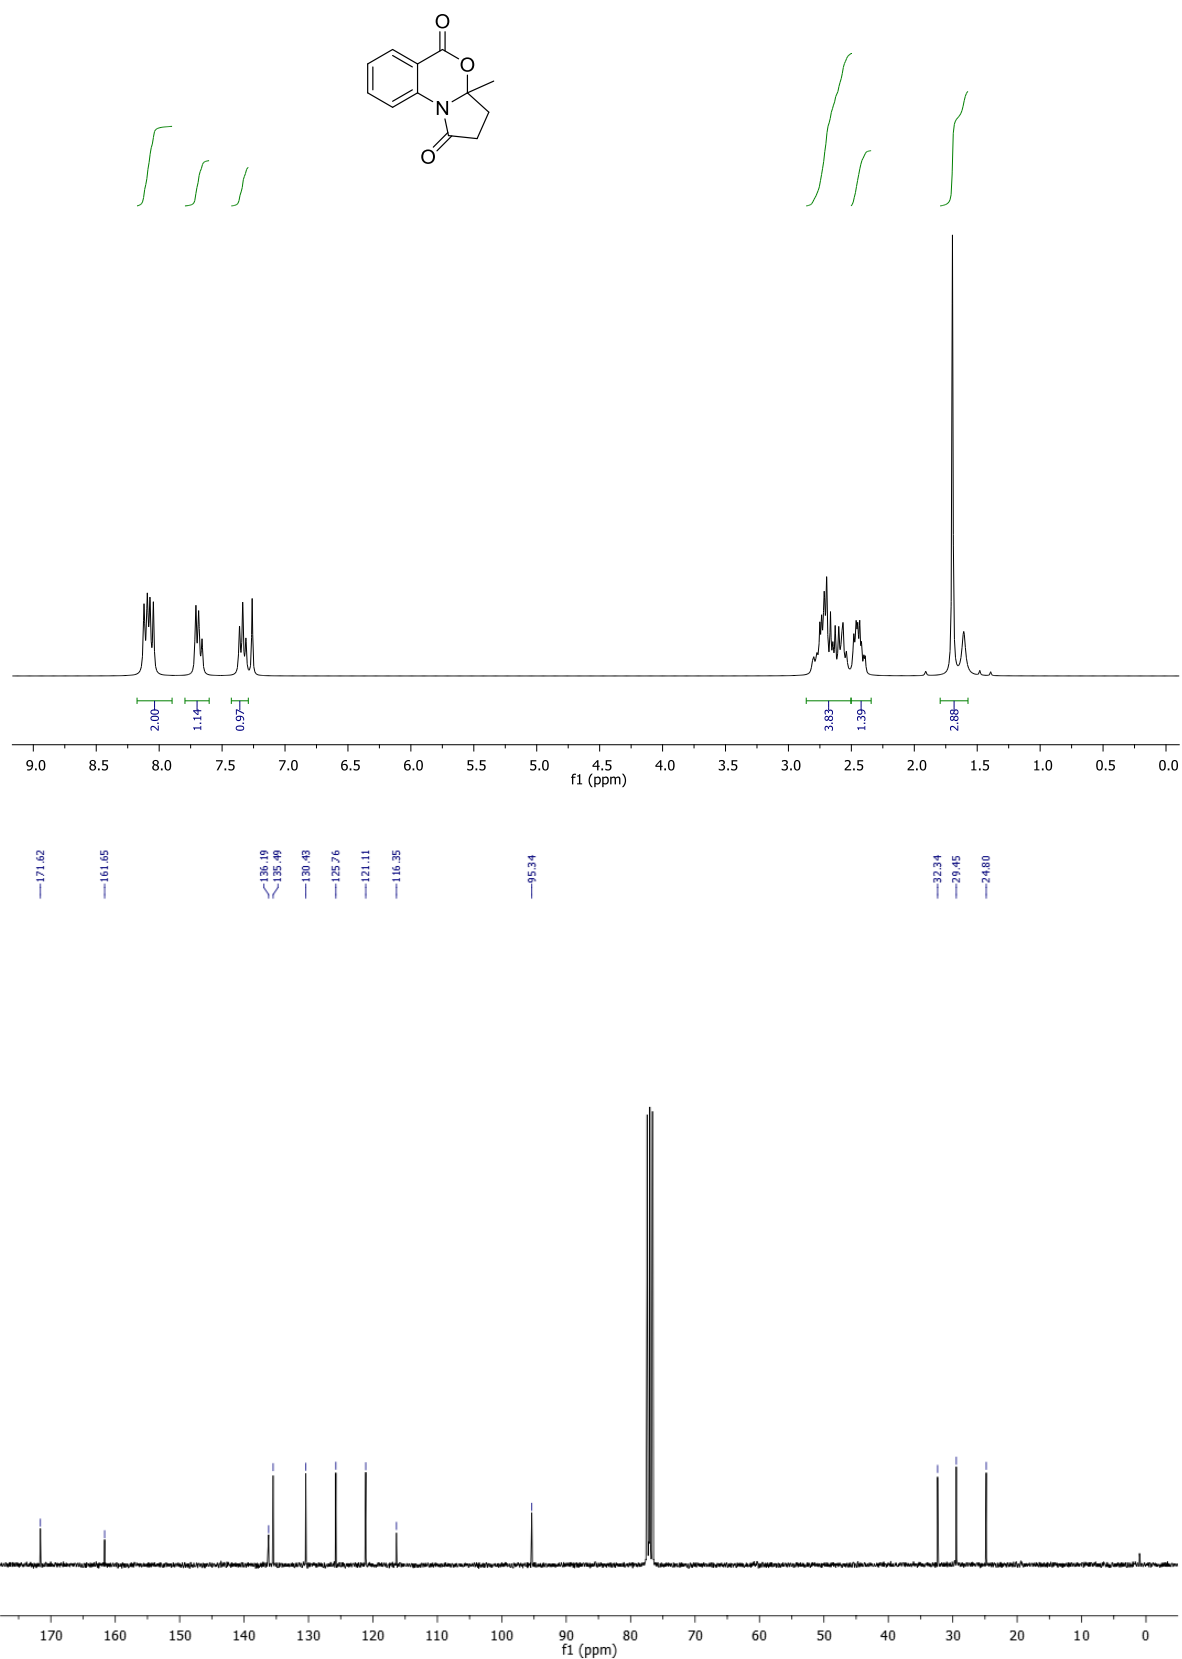

2-hexyl-3a-methyl-3,3a-dihydro-1*H*-benzo[*d*]pyrrolo[2,1-*b*][1,3]oxazine-1,5(2*H*)-dione (**4b**)

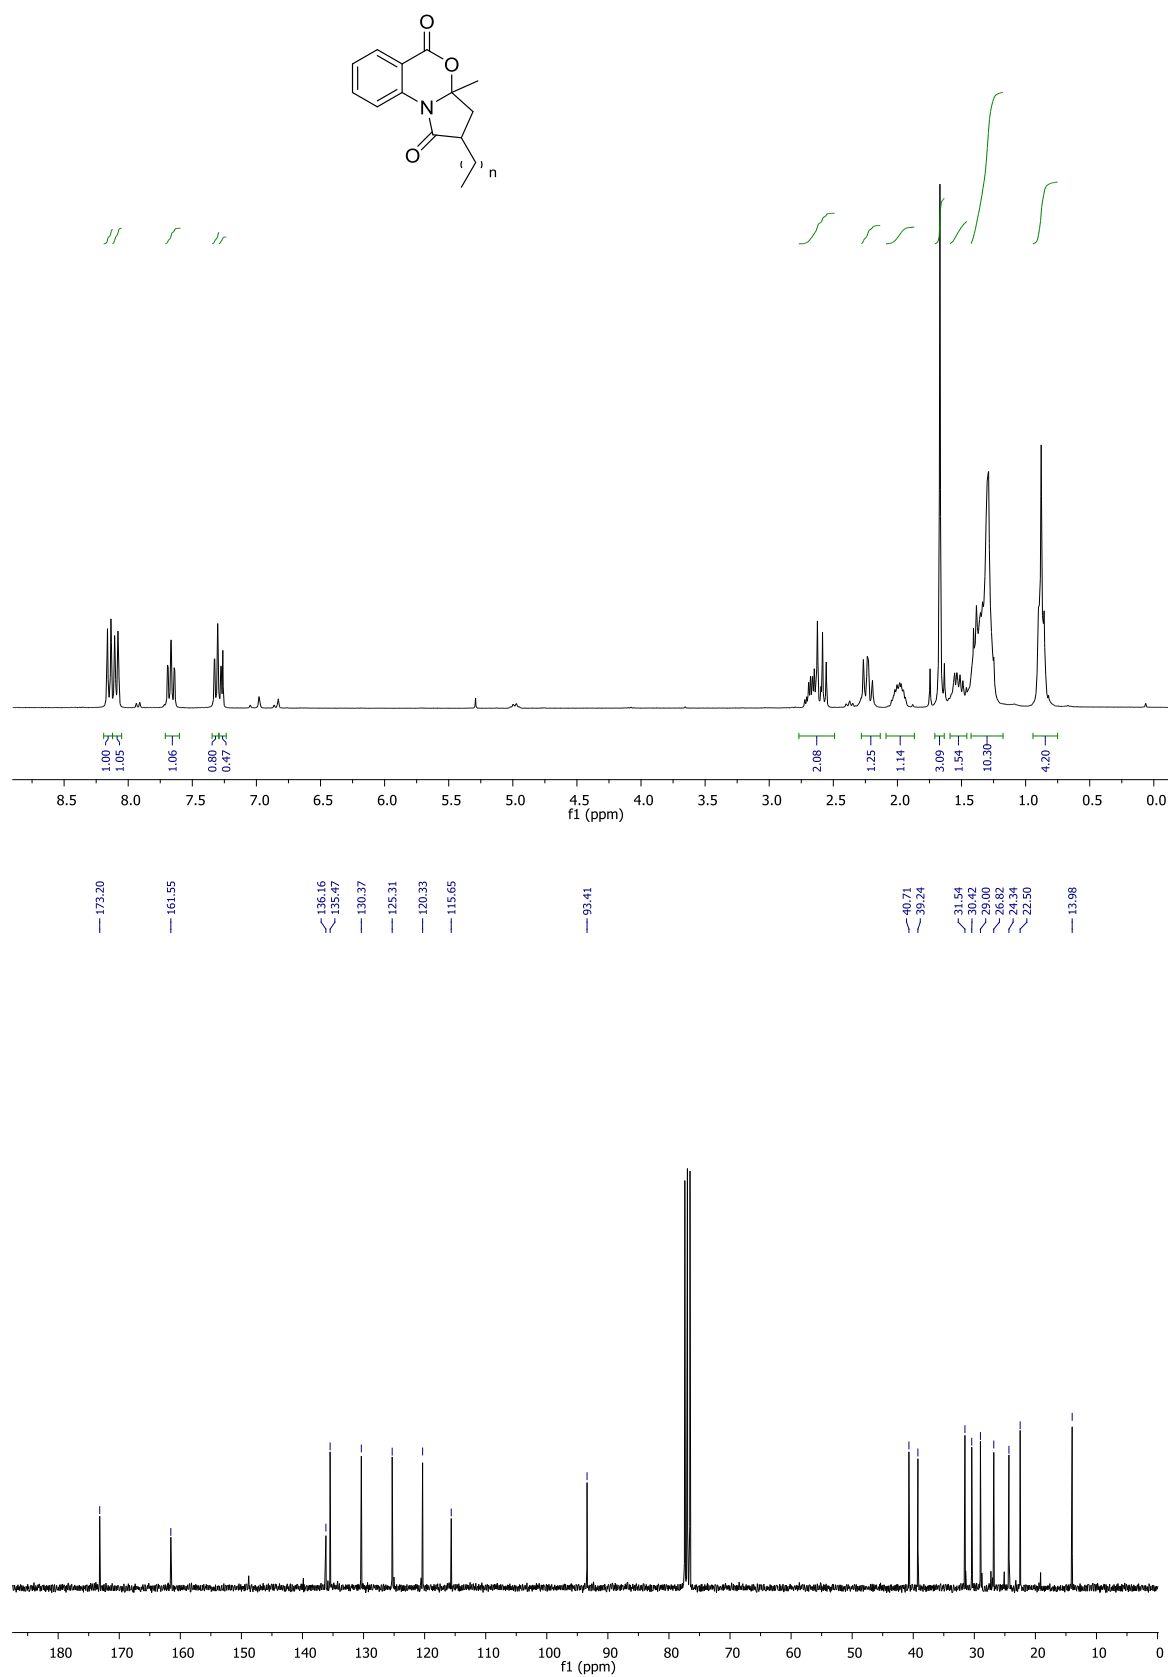

6a-methyl-5*H*-benzo[4,5][1,3]oxazino[2,3-*a*]isoindole-5,11(6*aH*)-dione (**6c**)

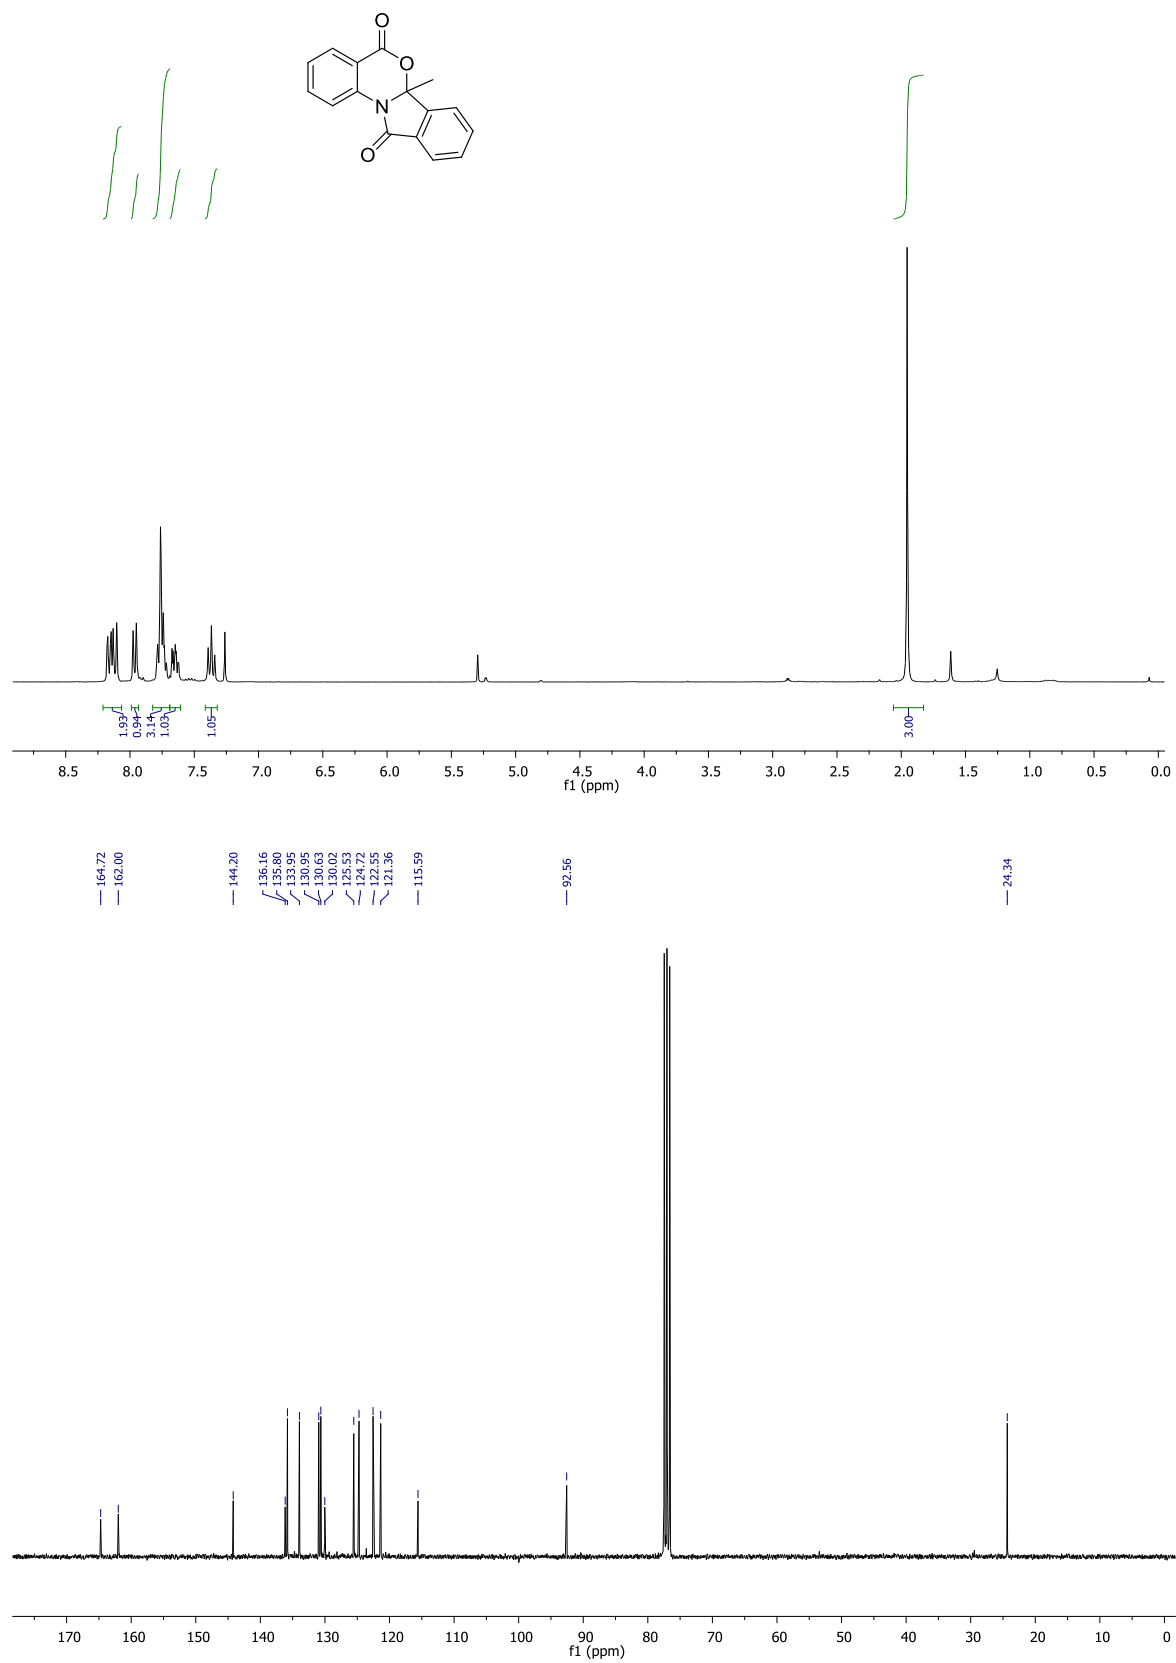

4a-methyl-2,3,4,4a-tetrahydro-1*H*,6*H*-benzo[d]pyrido[2,1-*b*][1,3]oxazine-1,6-dione (**4d**)

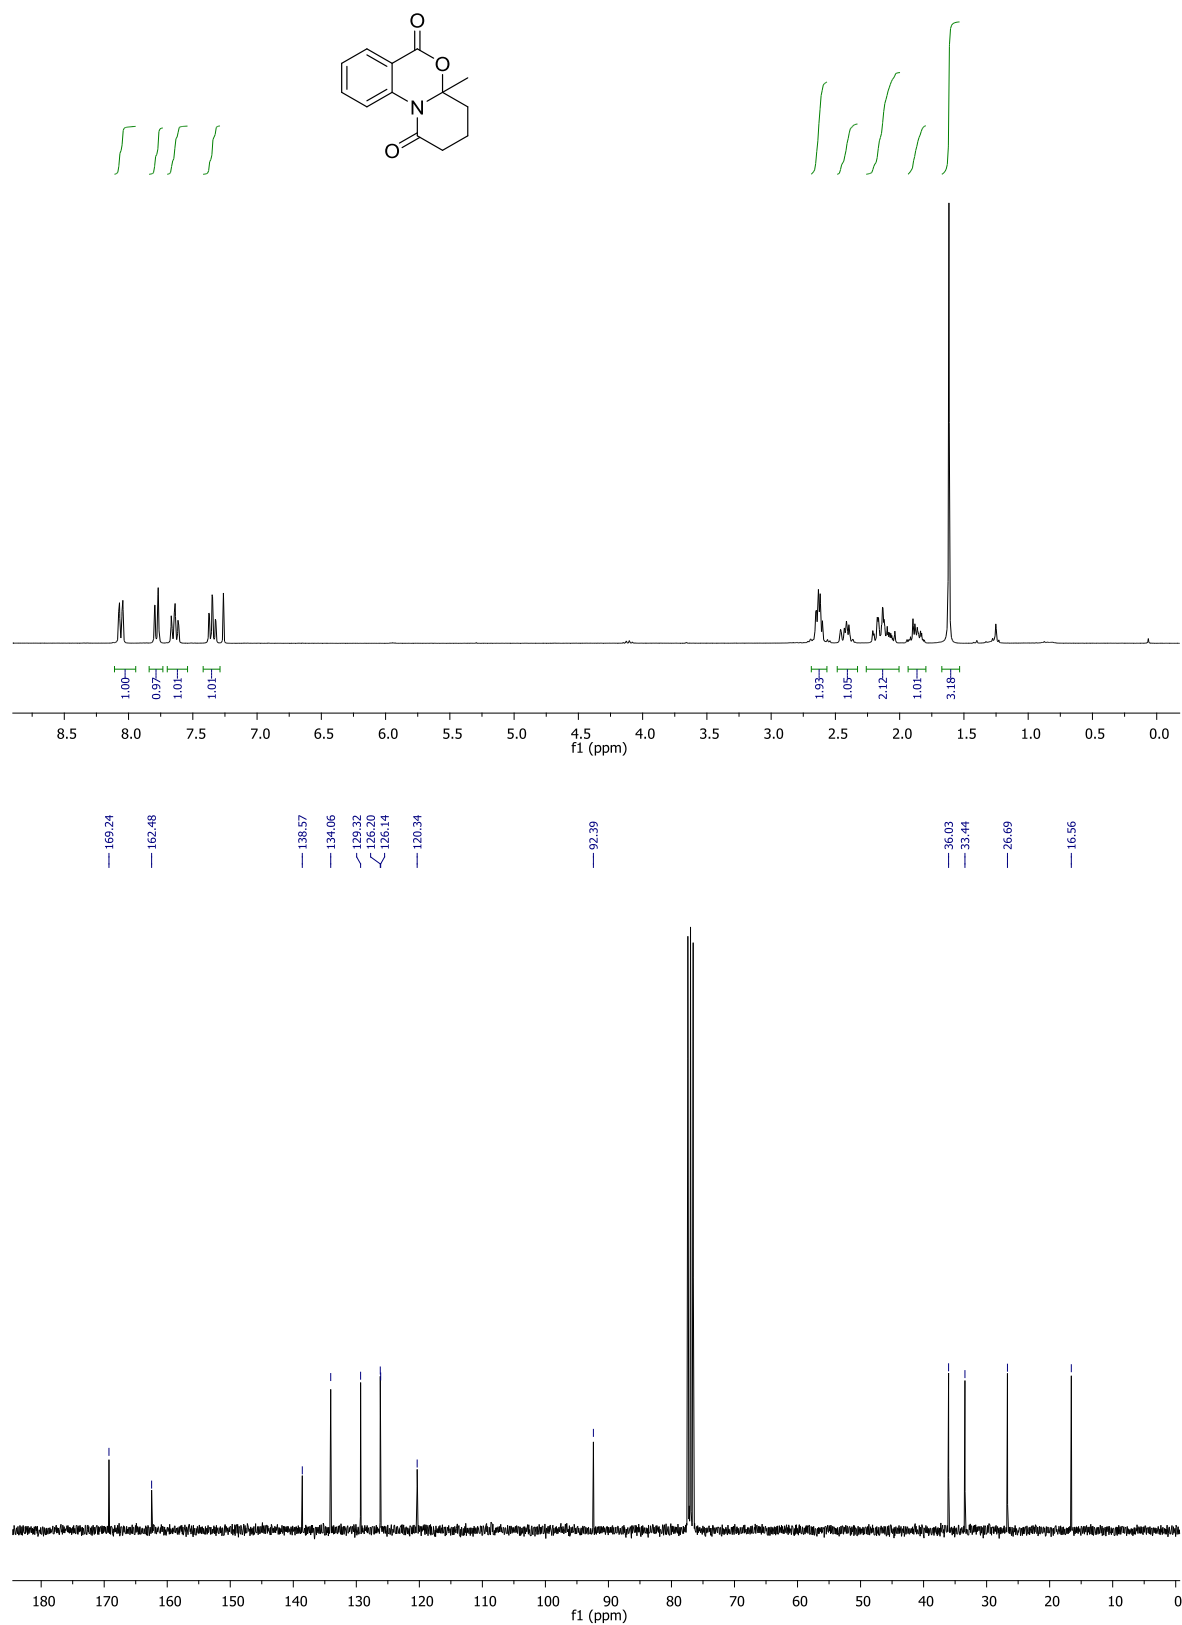

3a-benzyl-3,3a-dihydro-5H-benzo[d]pyrrolo[2,1-b][1,3]oxazine-1,5(2H)-dione (**4e**)

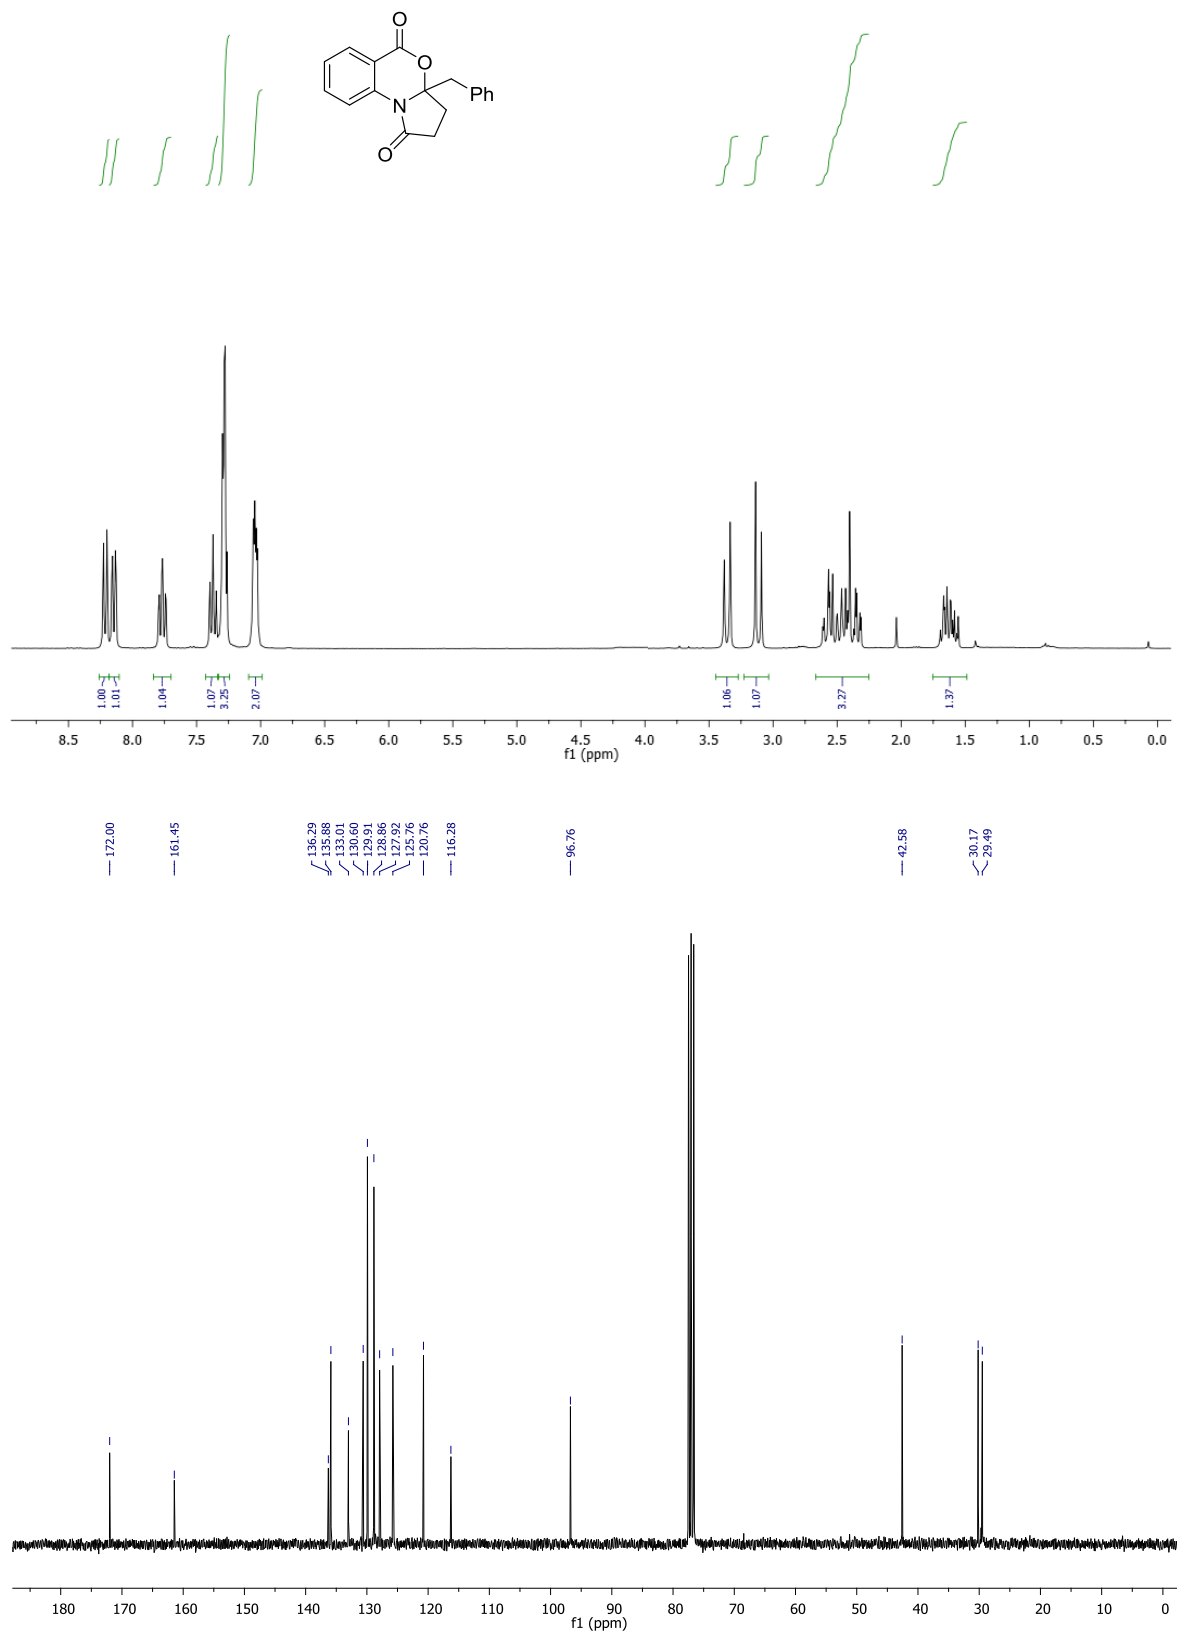

3a-methyl-2,3,3a,4-tetrahydro-1*H*-benzo[*e*]pyrrolo[2,1-*c*][1,2,4]thiadiazin-1-one 5,5-dioxide (4f)

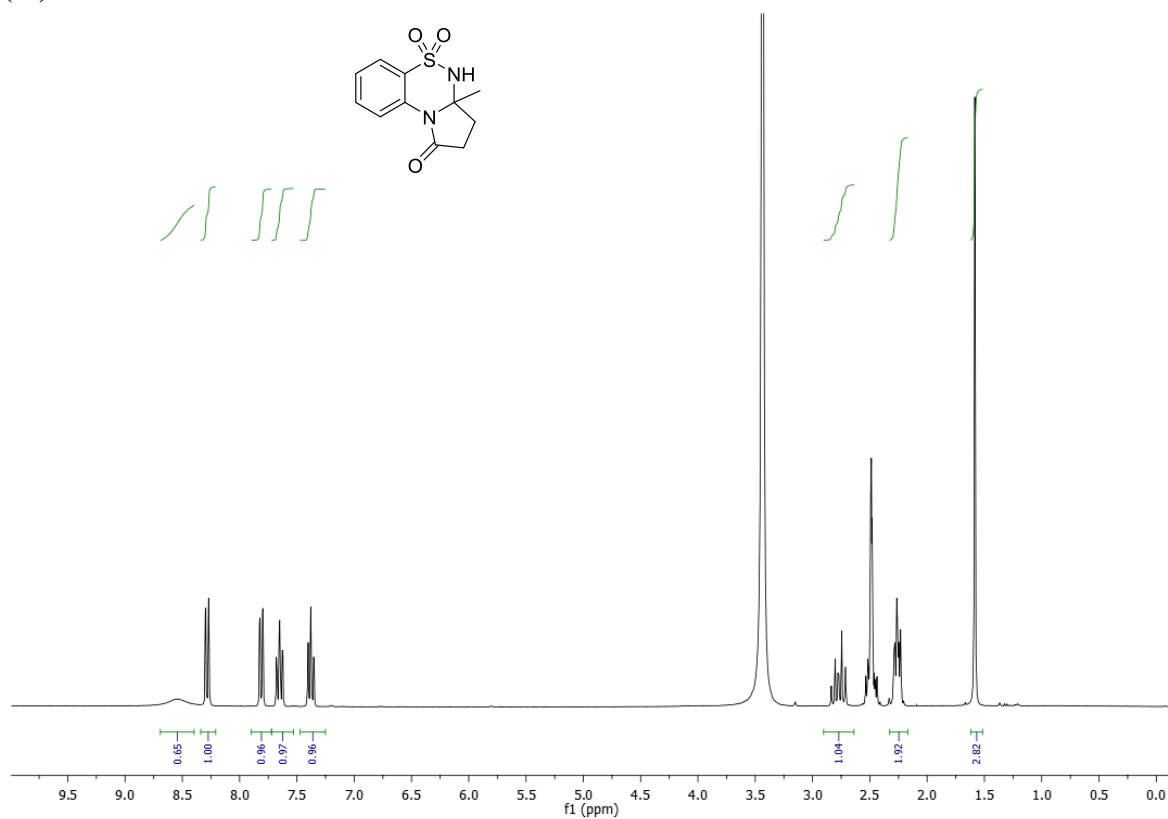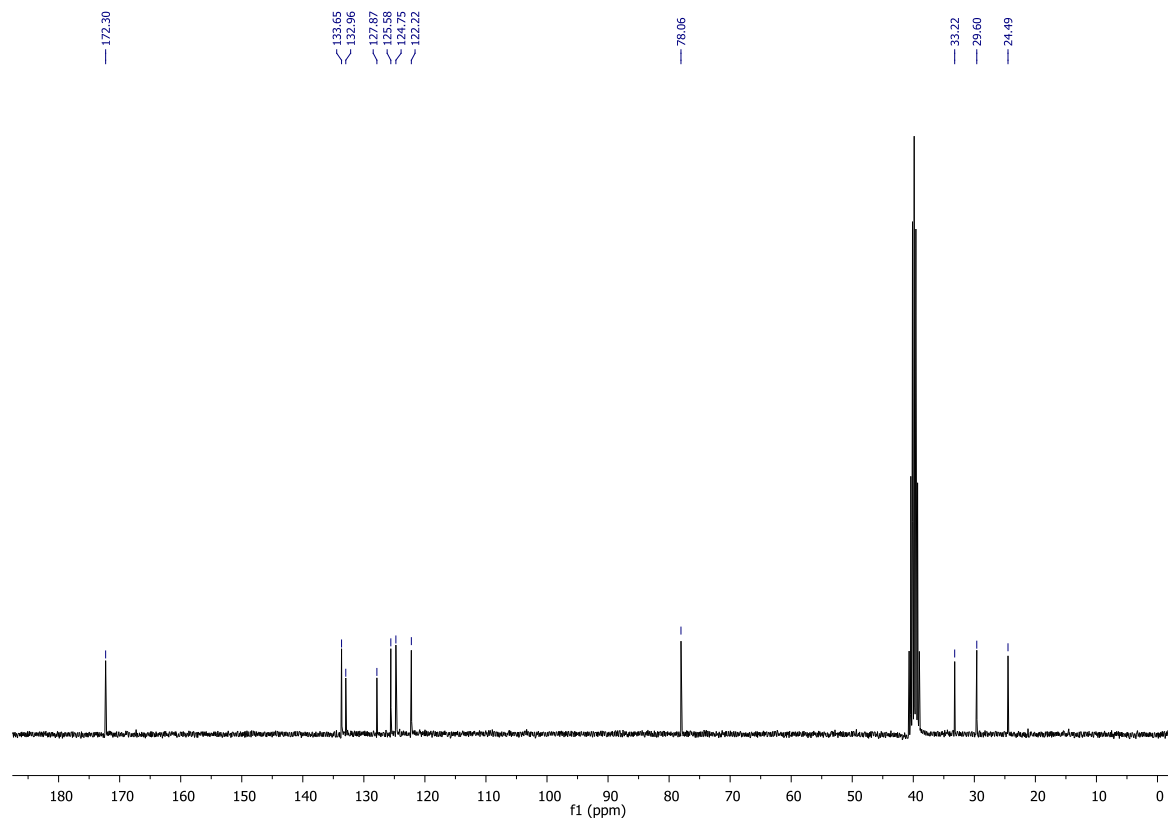

6a-methyl-6a,7,8,9-tetrahydrobenzo[e]pyrido[2,1-*c*][1,2,4]thiadiazin-10(6*H*)-one 5,5-dioxide (4g)

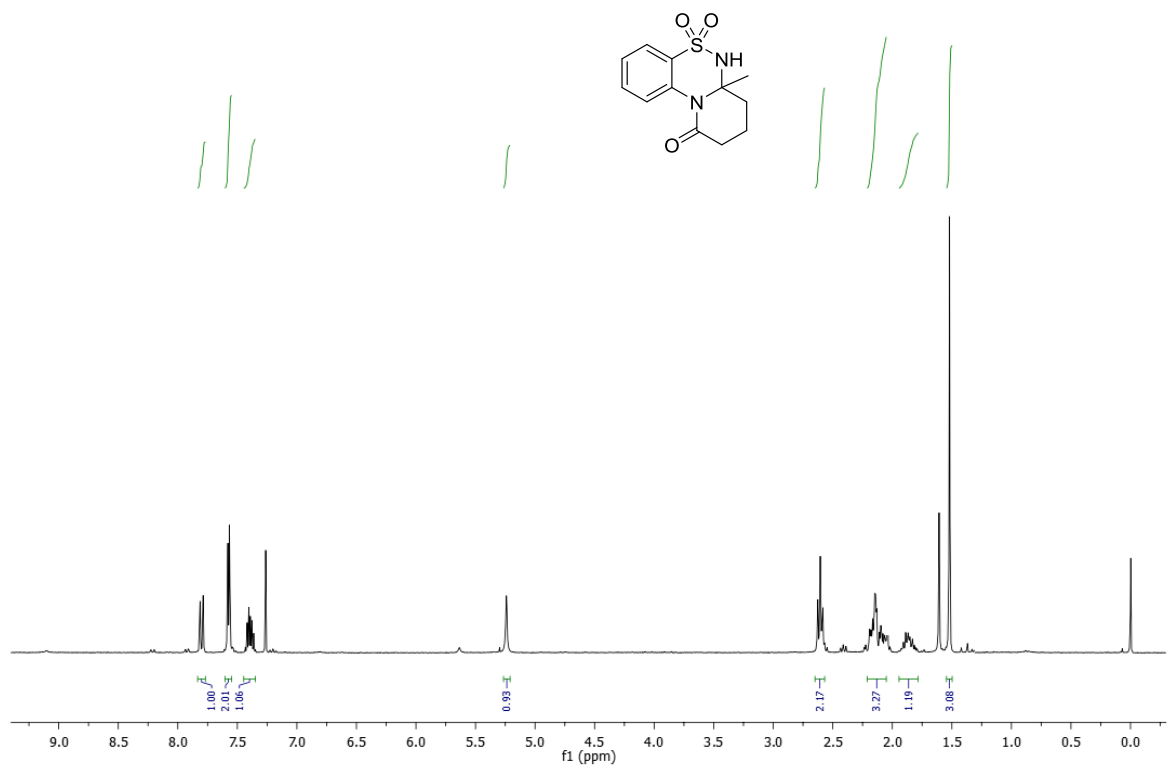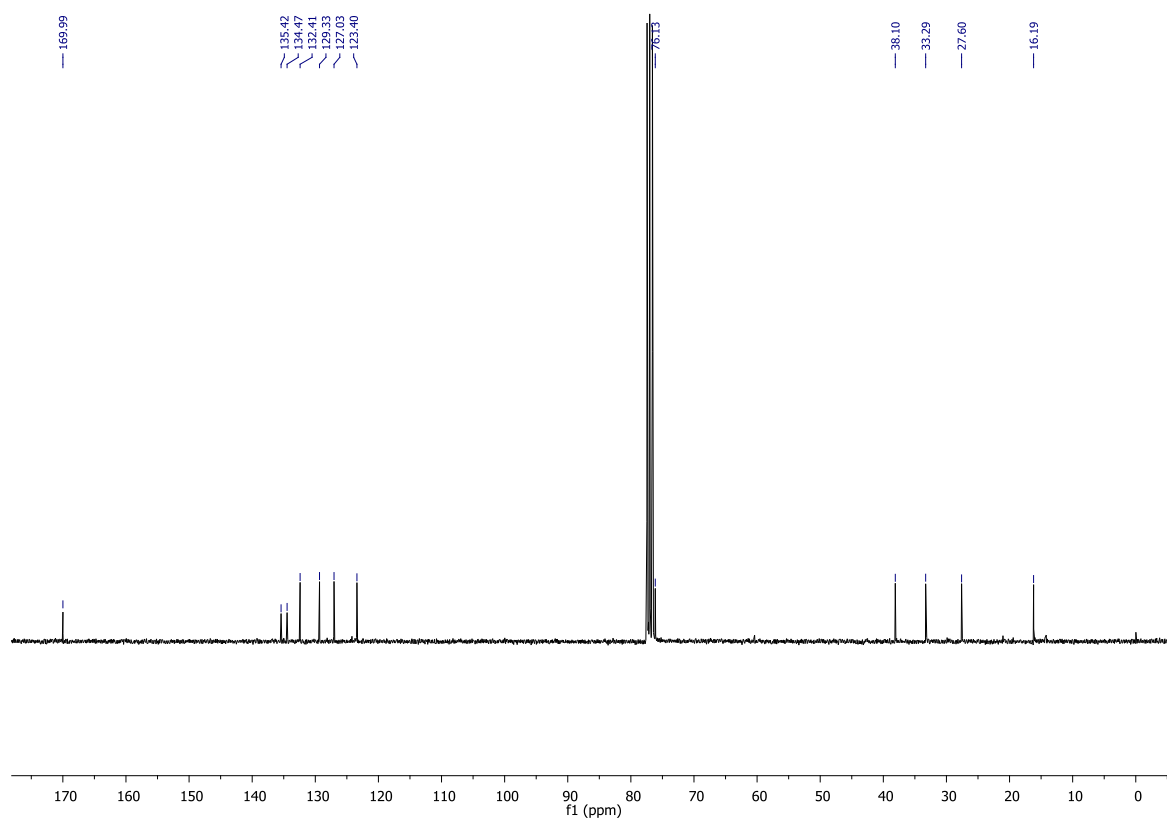

3a-benzyl-2,3,3a,4-tetrahydro-1*H*-benzo[*e*]pyrrolo[2,1-*c*][1,2,4]thiadiazin-1-one 5,5-dioxide (4h)

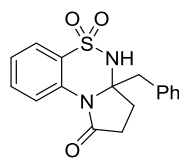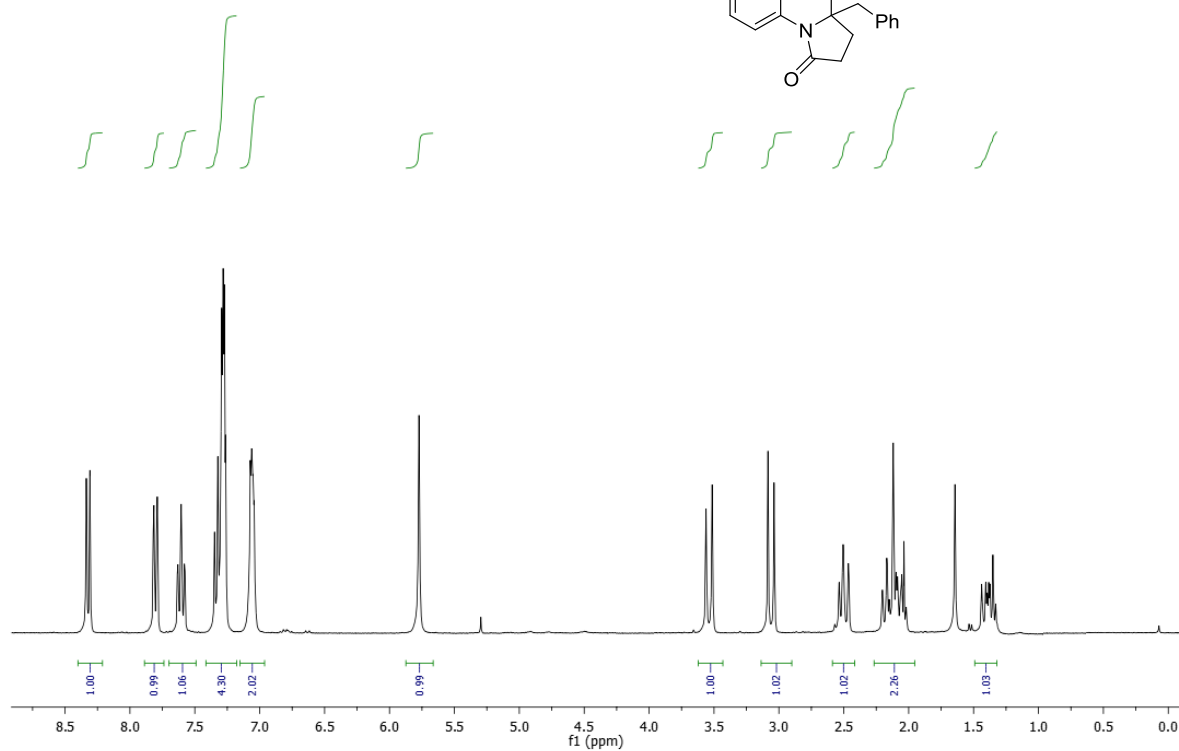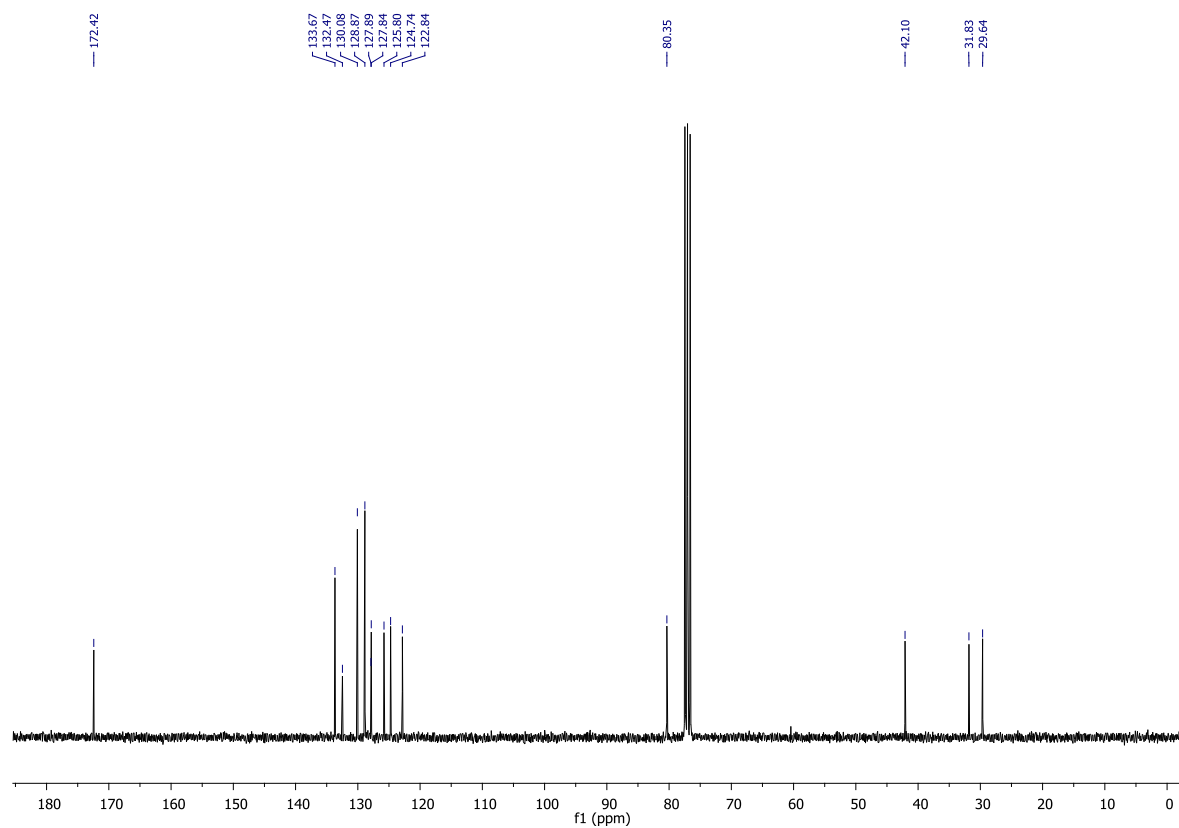

3a-methyl-3,3a,4,9-tetrahydropyrrolo[2,1-*b*]quinazolin-1(2*H*)-one (**6a**)

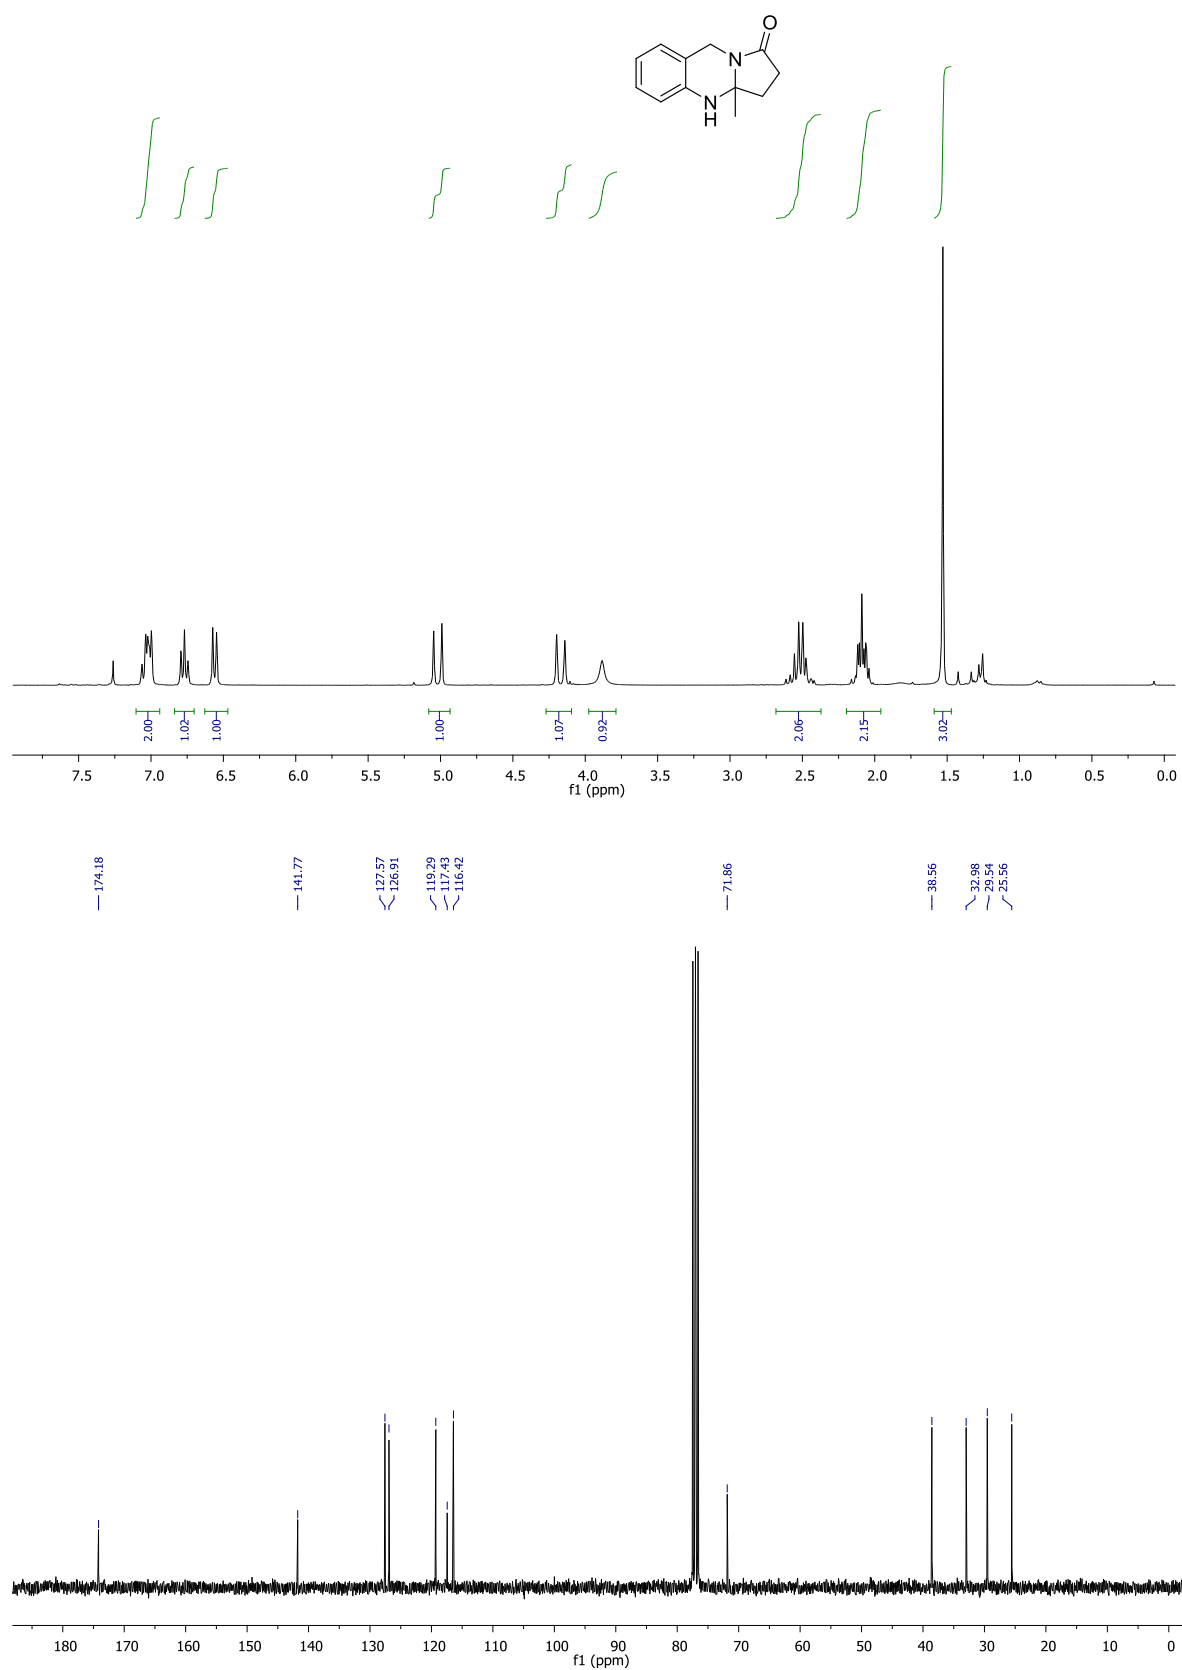

4b-methyl-5,10-dihydroisindolo[1,2-*b*]quinazolin-12(4*bH*)-one (**6b**)

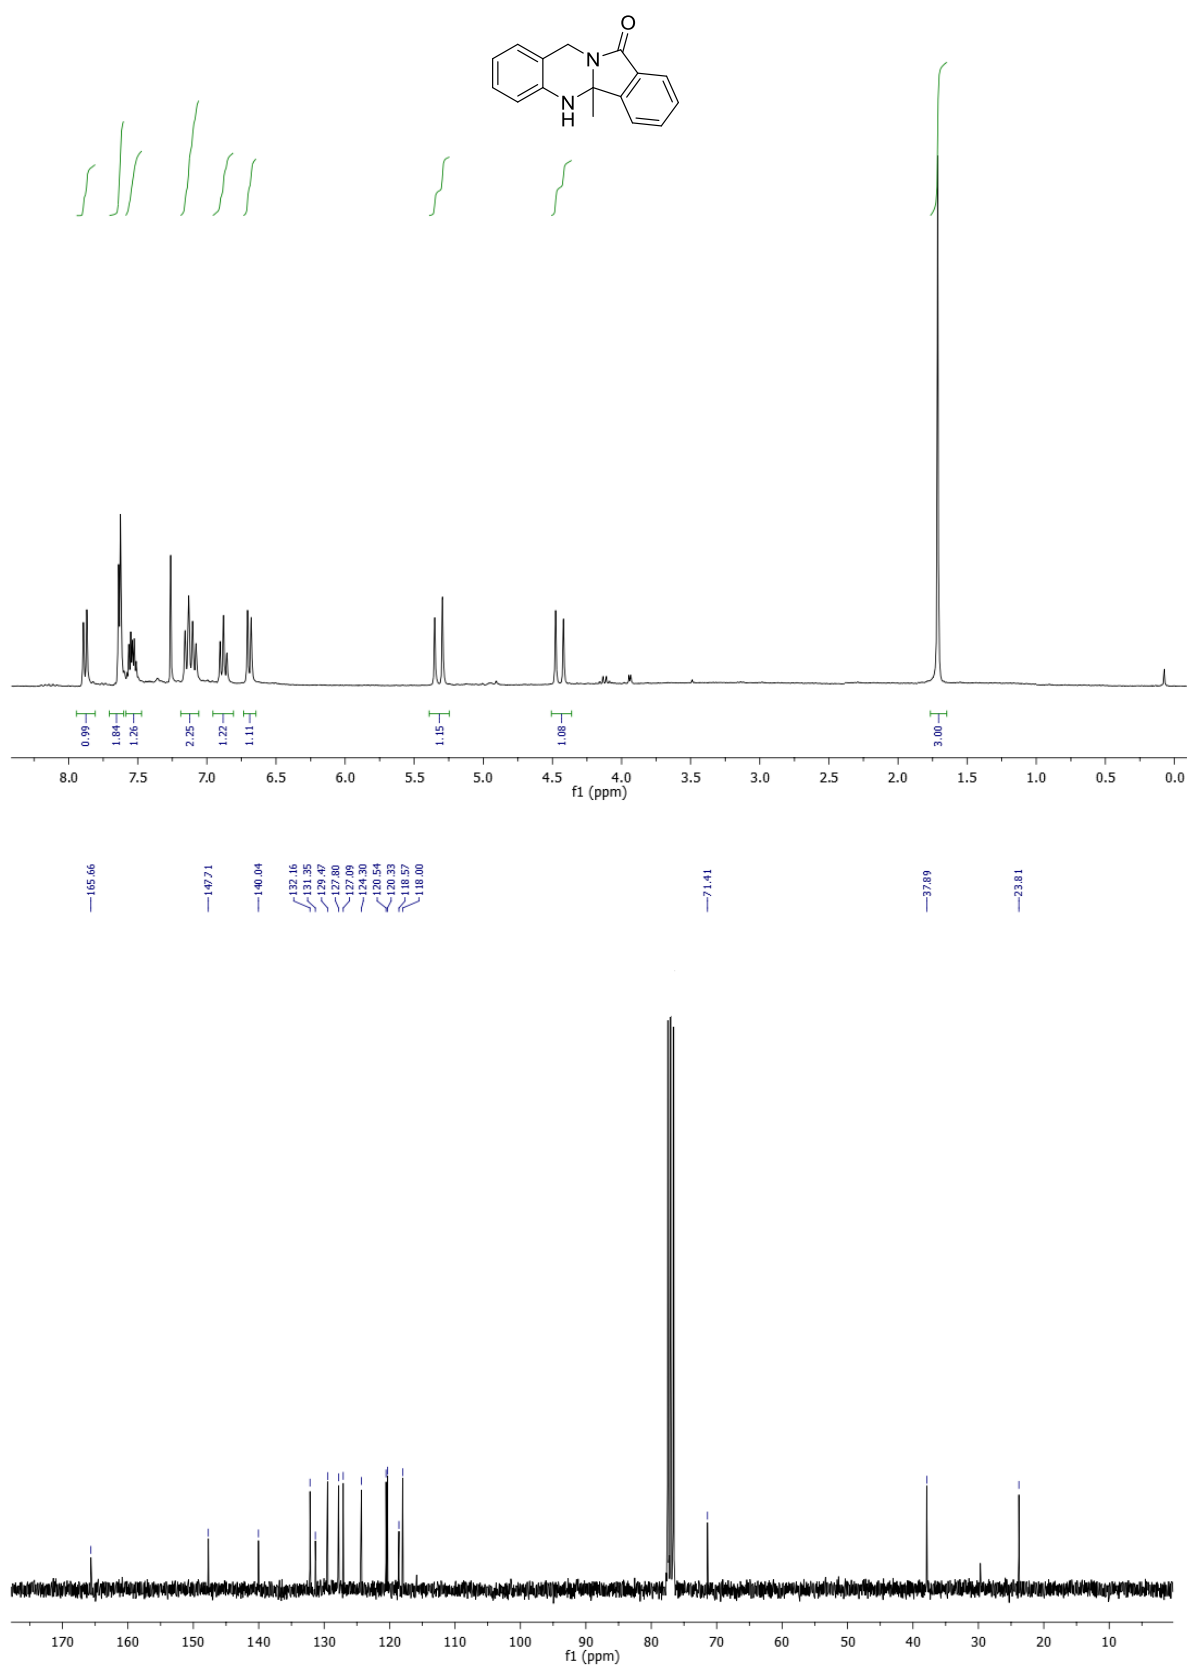

5a-methyl-5,5a,6,7,8,11-hexahydro-9H-pyrido[2,1-b]quinazolin-9-one (**6c**)

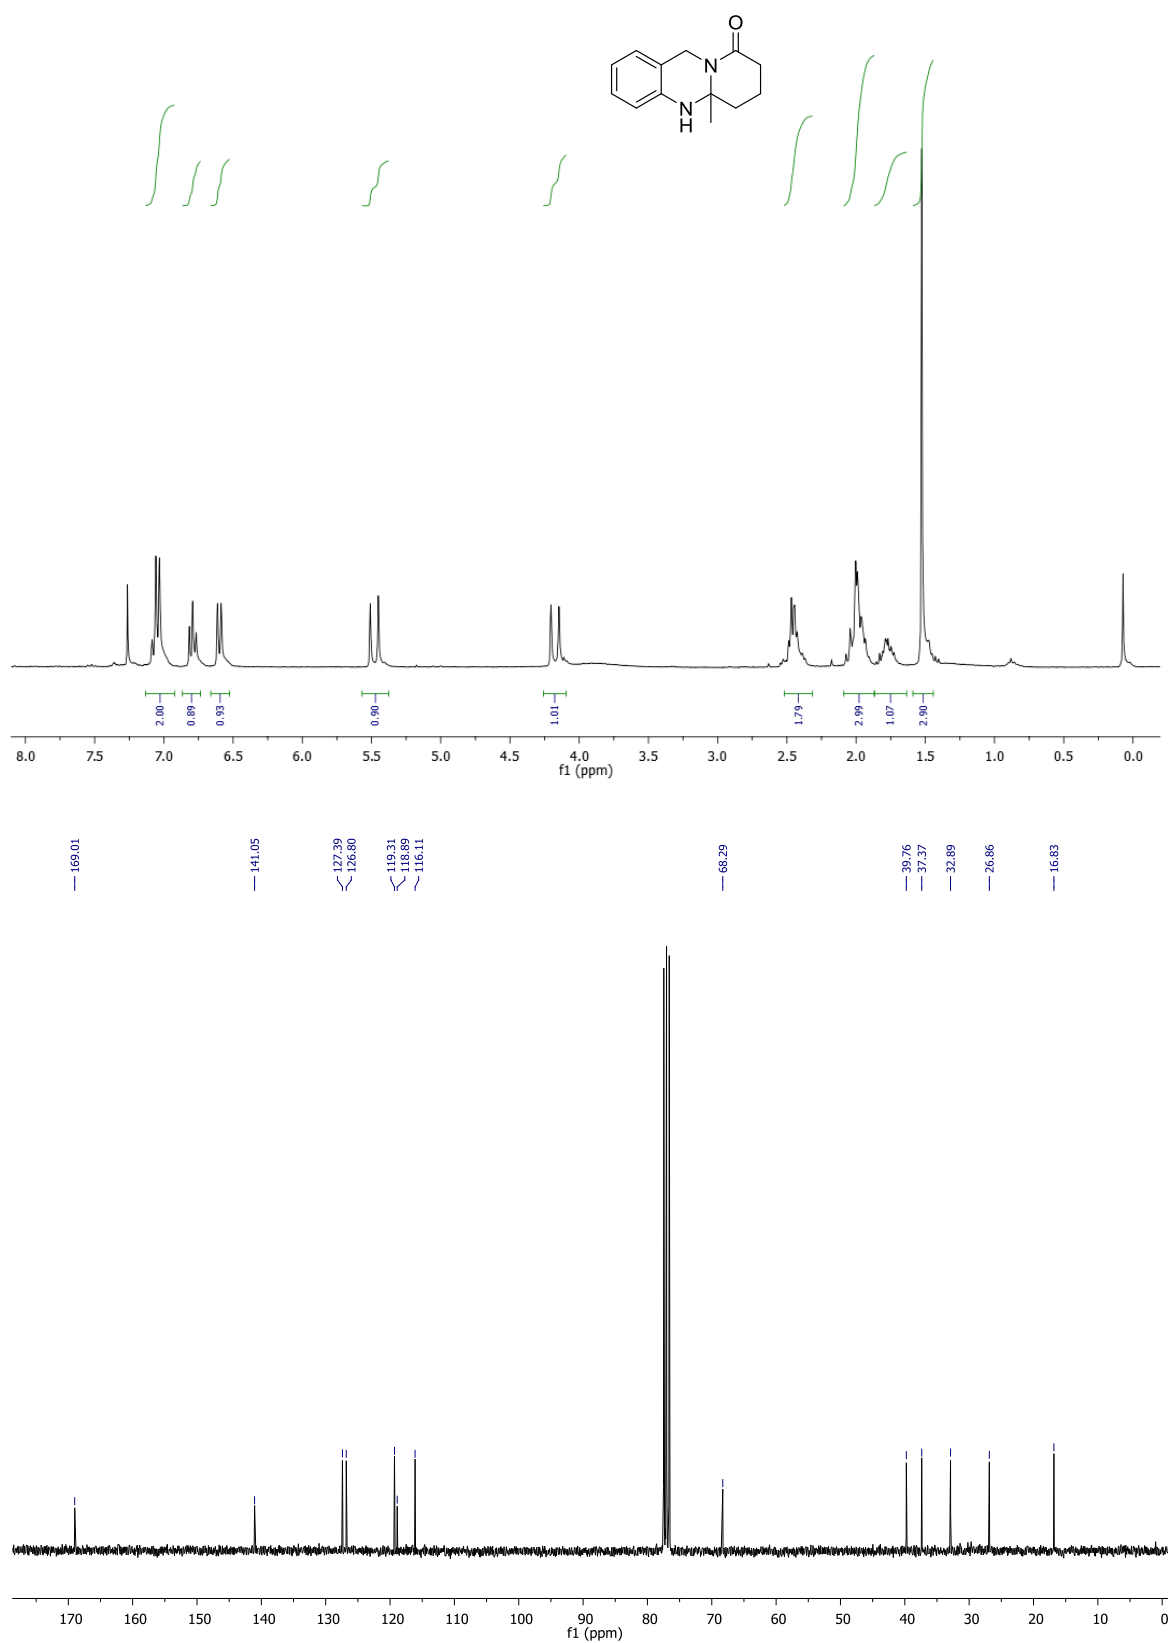

3a-benzyl-3,3a,4,9-tetrahydropyrrolo[2,1-*b*]quinazolin-1(2*H*)-one (**6d**)

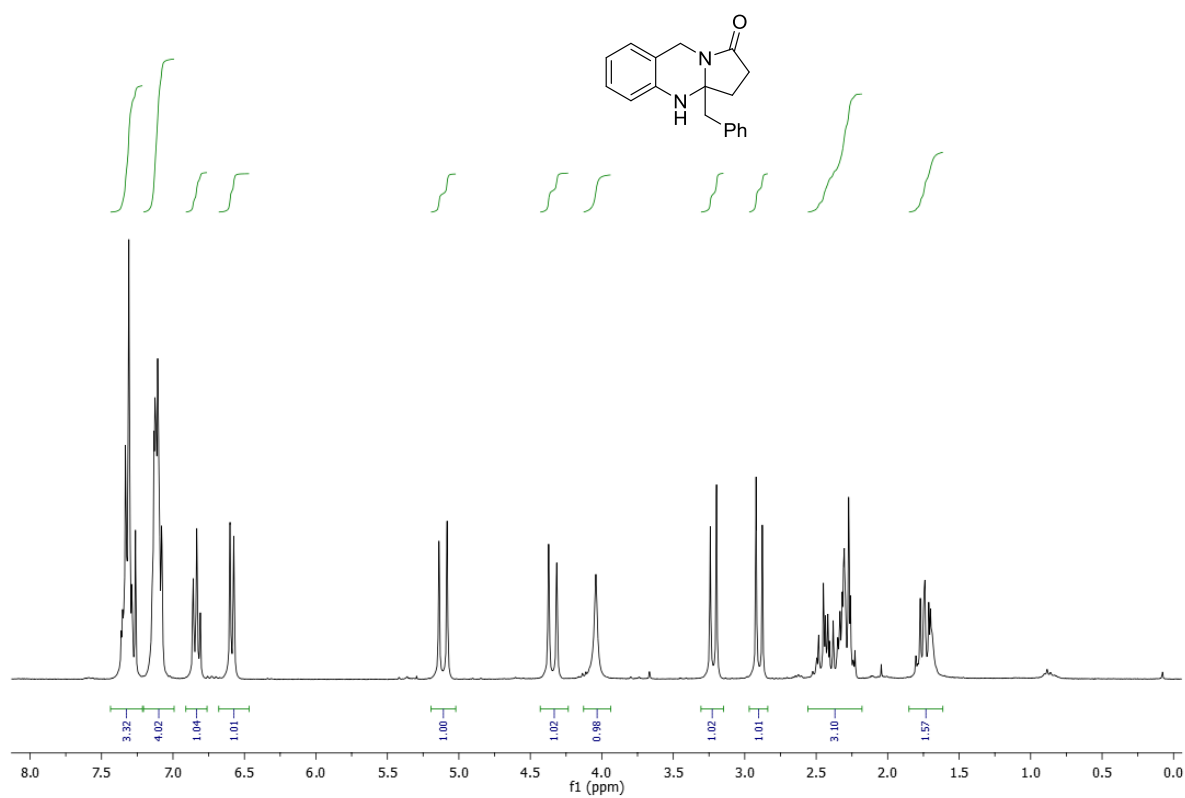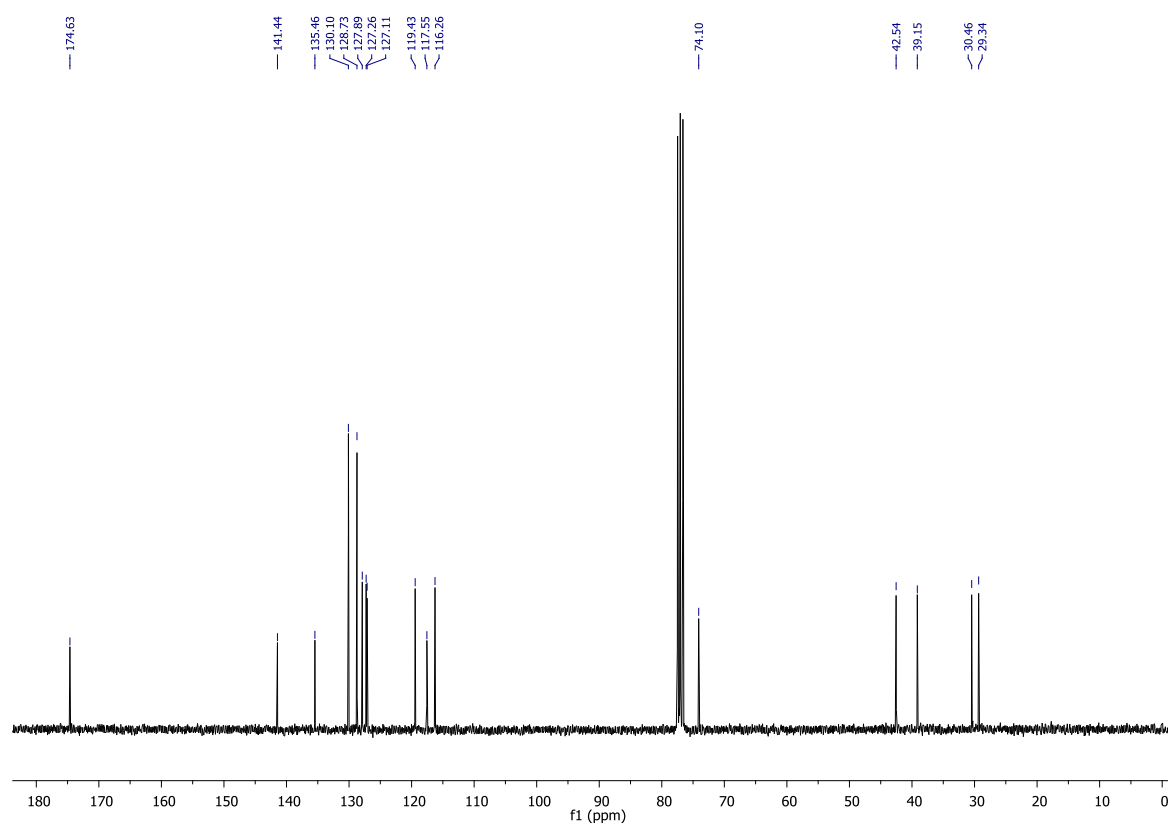

3a-methyl-2,3,3a,4-tetrahydro-1*H*-benzo[*d*]pyrrolo[1,2-*a*]imidazol-1-one (**6e**)

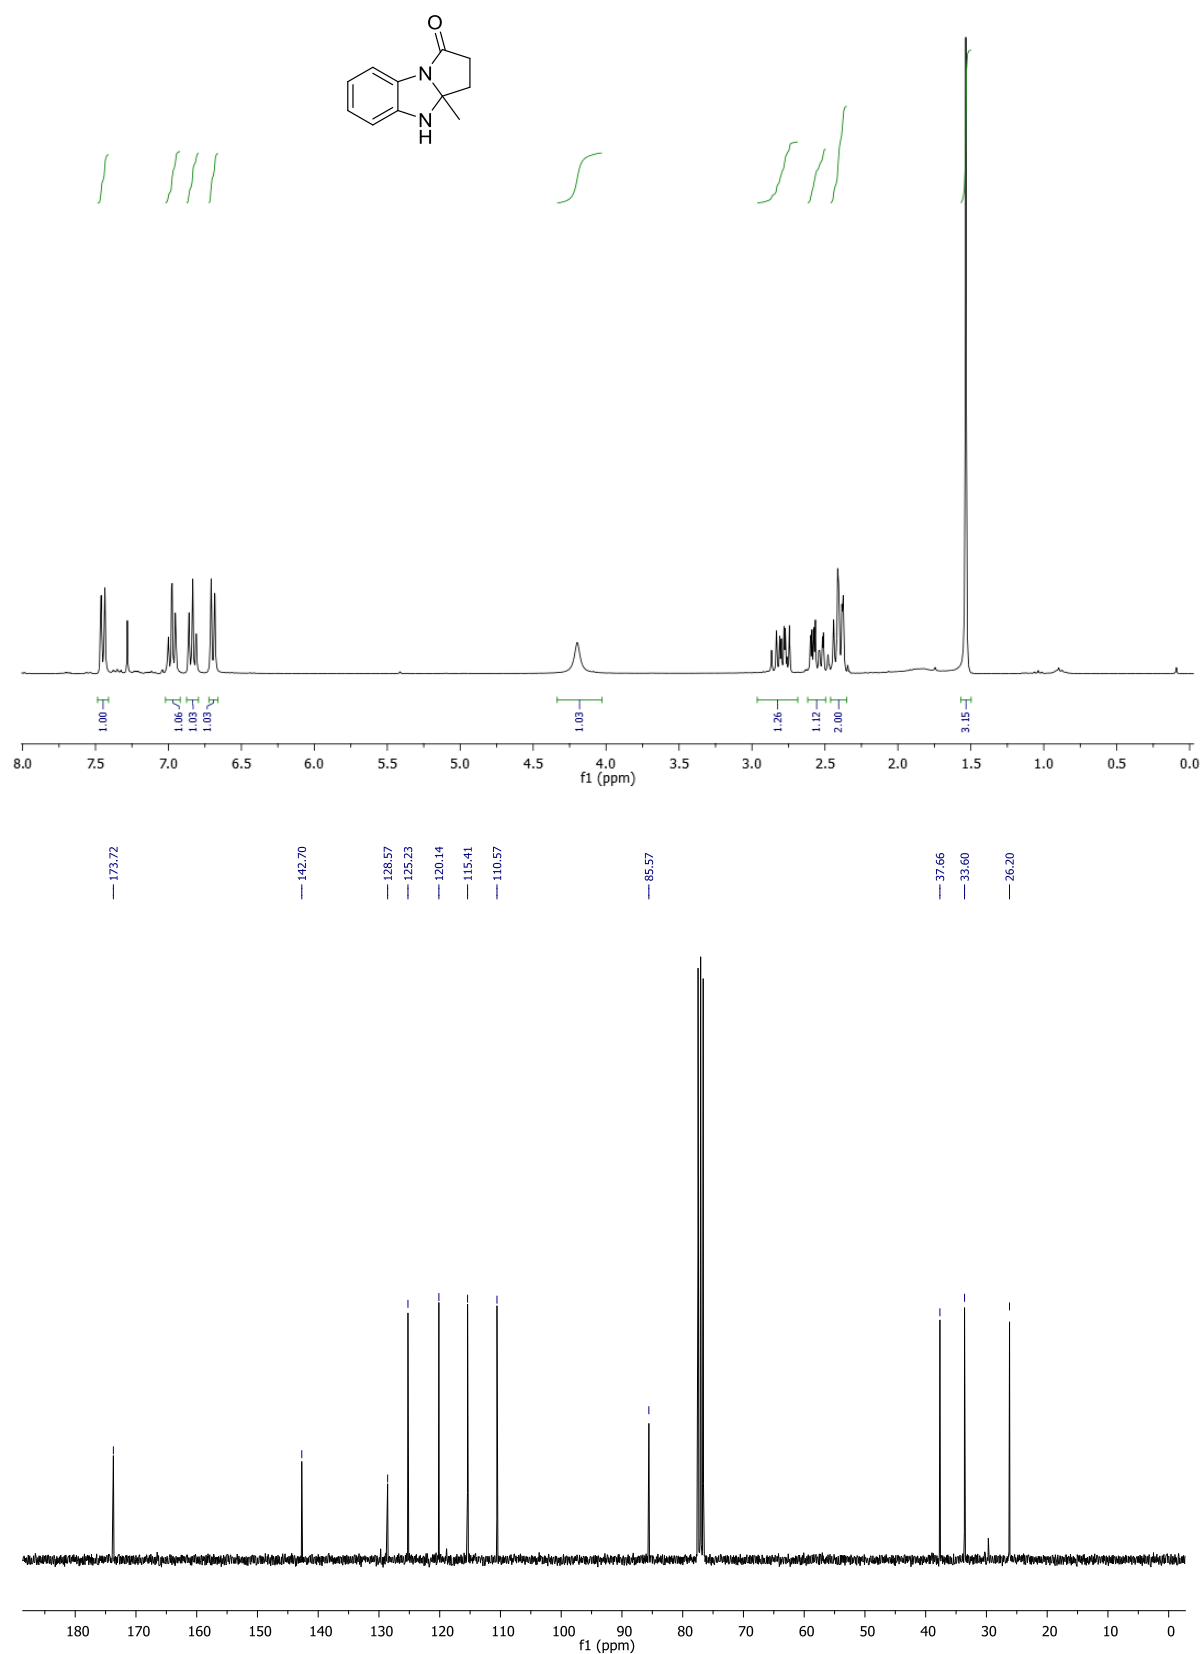

8a-methyl-7,8,8a,9-tetrahydro-6*H*-pyrrolo[1',2':1,2]imidazo[4,5-*b*]pyridin-6-one (**6g**)

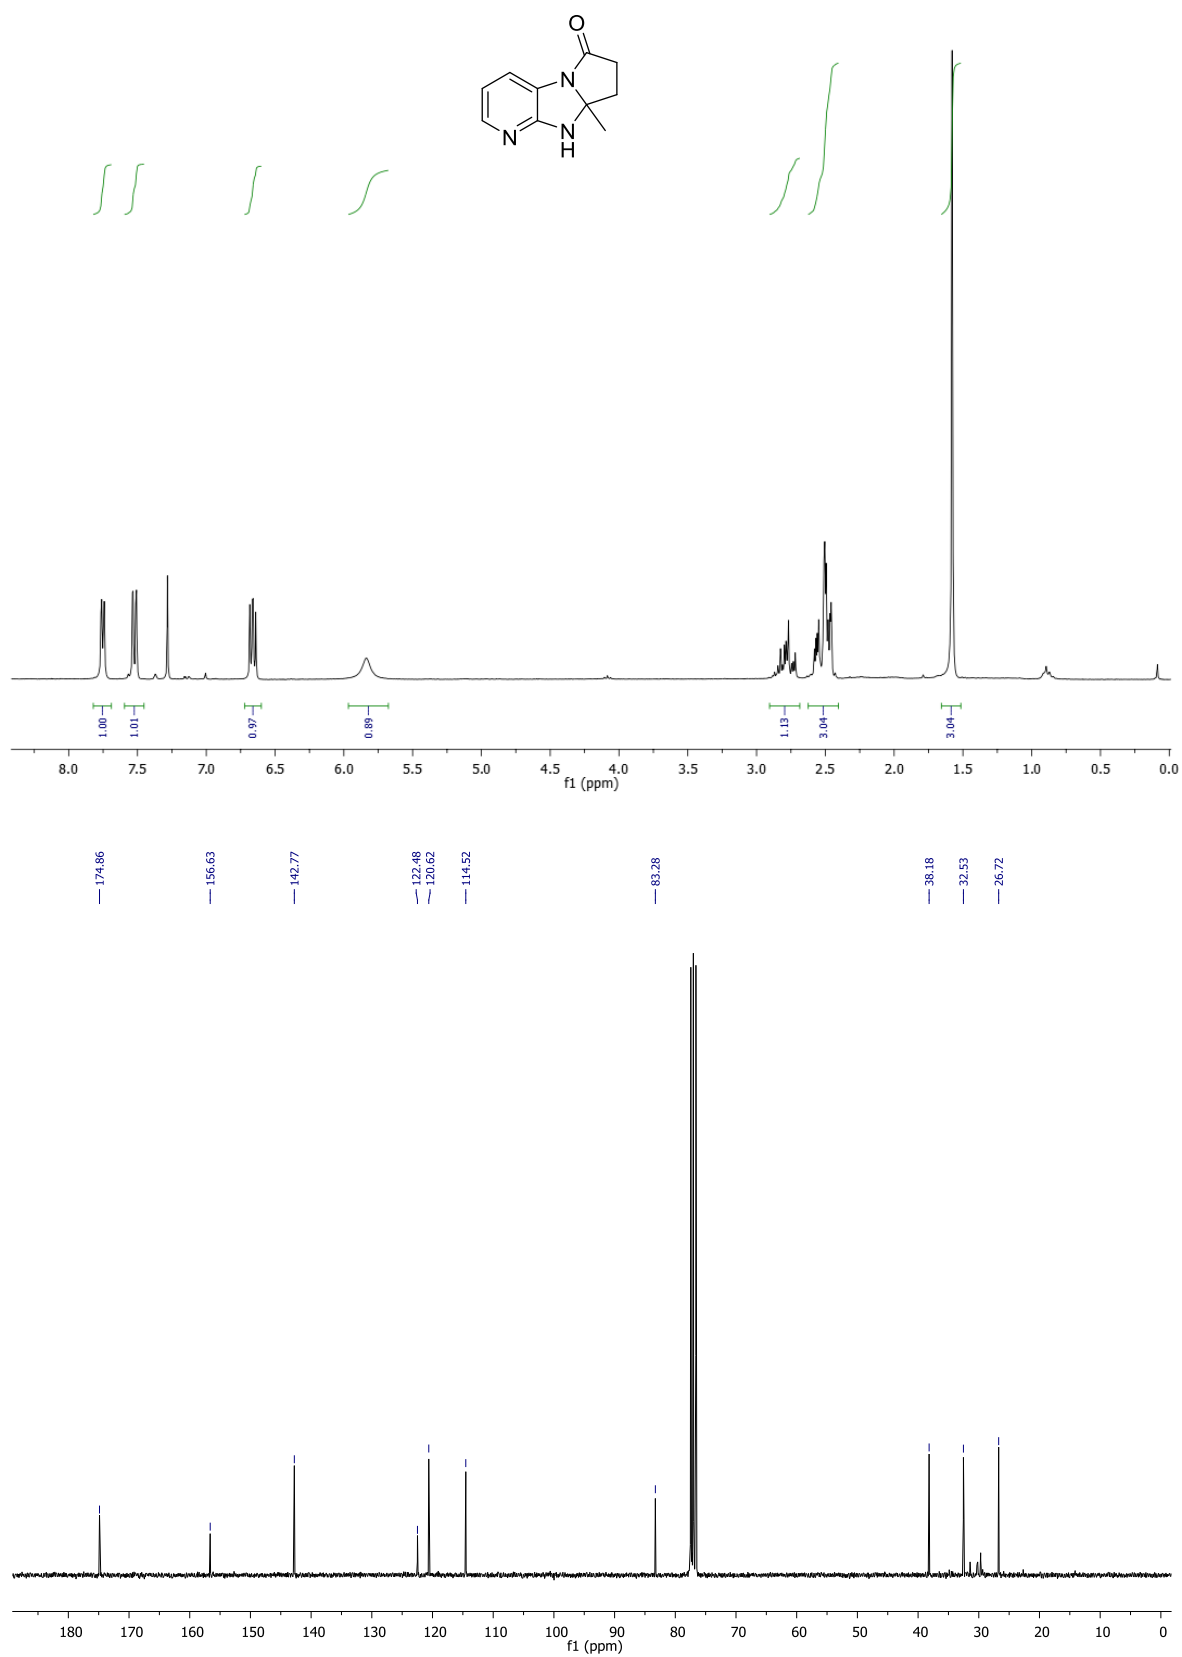

## References

- 1 H. Harkat, A. Y. Dembele, J.-M. Weibel, A. Blanc, P. Pale *Tetrahedron* **2009**, *65*, 1871-1879.
